# Molecular phylogeography reveals an antitropical distribution and local diversification of *Solenogyne* (Asteraceae) in the Ryukyu Archipelago of Japan and Australia

KOH NAKAMURA<sup>1\*</sup>, TETSUO DENDA<sup>2</sup>, GORO KOKUBUGATA<sup>3</sup>, PAUL I. FORSTER<sup>4</sup>, GARY WILSON<sup>5</sup>, CHING-I PENG<sup>1\*</sup> and MASATSUGU YOKOTA<sup>2</sup>

<sup>1</sup>Biodiversity Research Center, Academia Sinica, Nangang, Taipei 115, Taiwan

<sup>2</sup>Laboratory of Ecology and Systematics, Faculty of Science, University of the Ryukyus, Senbaru 1, Nishihara, Okinawa 903-0213, Japan

<sup>3</sup>Department of Botany, National Museum of Nature and Science, Amakubo 4-1-1, Tsukuba, Ibaraki 305-0005, Japan

<sup>4</sup>Queensland Herbarium, Department of Environment & Resource Management, Brisbane Botanic Gardens, Mt Coot-tha Road, Toowong, Queensland 4066, Australia

<sup>5</sup>Queensland Herbarium at the Australian Tropical Herbarium (CNS), James Cook University, Cairns, Queensland 4870, Australia

Received 16 February 2011; revised 24 July 2011; accepted for publication 24 July 2011

An antitropical distribution represents an intriguing disjunction, in which a given species or sister lineages occupy regions north and south of the tropics but are absent from the intervening areas. *Solenogyne mikadoi* endemic to the Ryukyu Archipelago is regarded as an Australian element. Testing the phylogenetic relationship with Australian congeners and discussing the onset timing and causes of the disjunction would potentially enhance the understanding of antitropical distribution. A nuclear ribosomal DNA phylogeny was reconstructed using Bayesian and most parsimonious criteria with allied genera. *Solenogyne* was monophyletic and clustered with *Lagenophora huegelii* endemic to Australia, indicating the antitropical distribution and Australian origin of *Solenogyne*. Multispecies coalescent analysis based on nuclear ribosomal DNA and chloroplast DNA indicated the divergence of *S. mikadoi* and Australian congeners in the Plio-Pleistocene. Phylogenetic network analyses suggested that the ancestral lineage of *S. mikadoi* first colonized the southernmost island in the archipelago and then dispersed northward. The migration to the archipelago likely followed the flourishing of *Solenogyne* in open vegetation communities that radiated in south-eastern Australia during the late Pliocene. This disjunction might arise through long-distance dispersal across the tropics or, alternatively, through extinction in the tropics as a result of unsuitably high temperatures during climate oscillation and/or competitions from diverse tropical flora surviving since the early Tertiary. © 2011 The Linnean Society of London, *Biological Journal of the Linnean Society*, 2012, **105**, 197–217.

**ADDITIONAL KEYWORDS:** Astereae – extinction – intercontinental disjunction – *Lagenophora* – long-distance dispersal – Pleistocene – Pliocene – South-east Asia – tropics.

## INTRODUCTION

An antitropical (or amphitropical) distribution represents an intriguing pattern of disjunct occurrence of

organisms at a global scale, in which the same taxon or sister taxa occupy regions north and south of the tropics but are absent from the intervening tropical regions (Hubbs, 1952; Randall, 1981; Donoghue, 2011). Such a distribution has mostly been observed for marine organisms (e.g. algae, fishes, molluscs and seals in North and South America, Asia and

\*Corresponding authors.

E-mail: kohnakamur@gmail.com; bopeng@sinica.edu.tw

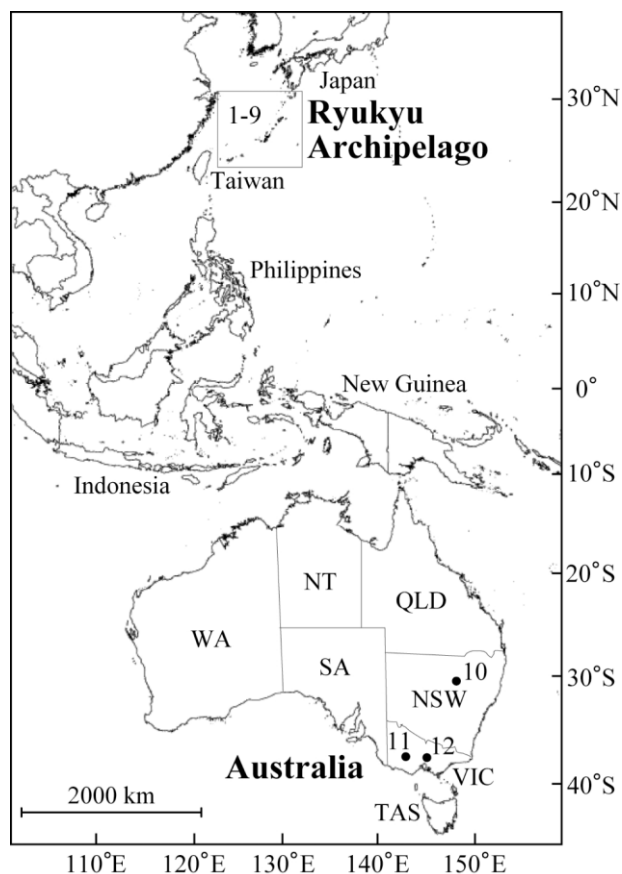

**Figure 1.** Disjunct distribution of *Solenogyne* in the Ryukyu Archipelago and south-eastern Australia. Collection localities: 1–9, *S. mikadoi*; 10, *S. bellioides*; 11, *S. dominii*; 12, *S. gunnii*. The numbers correspond to those in Table 1 and Fig. 2.

Australasia, and Europe and Africa; Ekman, 1953; Pielou, 1979; Santelices, 1980; Briggs, 1995; Hilbish *et al.*, 2000; Burridge, 2002; Mabuchi, Nakabo & Nishida, 2004). Reports of land plants showing antitropical distributions are mainly limited to disjunctions between North and South America (Constance, 1963; Raven, 1963; Wen & Ickert-Bond, 2009; Spalik *et al.*, 2010; Popp, Mirré & Brochmann, 2011). To increase our understanding of this phenomenon in plants, more studies in other regions are needed. These would potentially increase our knowledge on intercontinental disjunctions, for which taxonomists and biogeographers have attempted to elucidate their onset timing and causes (Gray, 1878; Raven, 1963; Thorne, 1972; Raven & Axelrod, 1974; Wu, 1983; Wen, 1999; Parris, 2001; Wen & Ickert-Bond, 2009).

The Ryukyu Archipelago is an assemblage of continental islands between the main Japanese islands and Taiwan (Fig. 1). The archipelago lies in the subtropics and, as a result of the moderate climate

throughout the year and an annual precipitation of > 2000 mm with no dry season, the dominant natural vegetation of the islands is broad-leaved and evergreen (Maekawa, 1974; Nakamura *et al.*, 2009). The flora of the Ryukyu Archipelago can be divided approximately into six groups according to their assumed origins: from main Japanese islands, the East Asian continent, the East Asian continent via migration initially to the island of Taiwan, from South-east Asia without migration via Taiwan, from Pacific islands, and from Australia (Hatusima, 1975, 1980). Among the six groups, the most intriguing are the Australian elements because the Ryukyu Archipelago and Australia are more than 7000 km apart, in the northern and southern hemisphere, respectively. Among the Australian components, multiple species show disjunct distributions or have close relatives in eastern Australia; for example *Cassytha glabella* R.Br. and *Cassytha pubescens* R.Br. (Lauraceae), *Oxalis exilis* Cunn. (Oxalidaceae), *Lobelia loochooensis* Koidz. (Campanulaceae), *Solenogyne mikadoi* Koidz. (Asteraceae), and *Eriachne armitii* F.Muell. ex Benth. (Poaceae) (Adams, 1979; Hatusima, 1985; Murata, 1992; Shinjyo & Ikehara, 2006; Yokota & Hiraiwa, 2006; Yokota & Shinzato, 2006a, b). Thus, these are typical examples of antitropical distributions.

In the present study, we investigated in detail the genus *Solenogyne* Cass., a small genus in the tribe Astereae that comprises four species: *Solenogyne bellioides* Cass., *Solenogyne dominii* L.G.Adams, *Solenogyne gunnii* (Hook.f.) Cabrera, and *S. mikadoi* Koidz. (Adams, 1979). These are all small rosette-forming perennial herbs. The genus exhibits an extremely disjunct distribution (Fig. 1); *S. mikadoi* is endemic to the Ryukyu Archipelago, whereas the other three species are endemic to temperate south-eastern Australia (Brown & Porteners, 1992). *Solenogyne mikadoi* occurs on four relatively large islands with well-developed river systems, namely, Amami-oshima, Tokunoshima, Okinawajima, and Iriomotejima (Fig. 2, Table 1), and grows on rocky beds of mountain streams (Yokota & Hiraiwa, 2006). In Australia, *S. bellioides* is reported from New South Wales and Queensland, *S. dominii* from New South Wales and Victoria, and *S. gunnii* from New South Wales, Victoria, and Tasmania (Fig. 1) (Brown & Porteners, 1992). The three Australian species grow in open sclerophyll vegetation with sparse overstorey trees or in anthropogenic pastures, and their habitats are drier than those of *S. mikadoi* in the Ryukyu Archipelago. The achenes (fruits) of *Solenogyne* have no pappi (feather-like appendages) commonly observed in Asteraceae (Davis, 1950), and thus do not appear to be adapted for long-distance dispersal. *Solenogyne* is considered to be closely allied to *Lagenophora* Cass.

**Table 1.** *Solenogyne* samples from the Ryukyu Archipelago, southern Japan, and south-east Australia, with locality information, chloroplast DNA (cpDNA) haplotypes and *atpB-rbcL* and *trnK3'* intron GenBank accession numbers, and nuclear ribosomal DNA (nrDNA) types and internal transcribed spacer (ITS) GenBank accession numbers

| Locality<br>code*                          | Locality                                                                              | Sample<br>number | CpDNA<br>haplotype | Accession        |                      | nrDNA<br>type | Accession                                    |                              | Voucher no. |
|--------------------------------------------|---------------------------------------------------------------------------------------|------------------|--------------------|------------------|----------------------|---------------|----------------------------------------------|------------------------------|-------------|
|                                            |                                                                                       |                  |                    | <i>atpB-rbcL</i> | <i>trnK3'</i> intron |               | ITS                                          |                              |             |
| <i>Solenogyne mikadoi</i> Koidz.           |                                                                                       |                  |                    |                  |                      |               |                                              |                              |             |
| 1                                          | Urauchigawa River, Iriomotejima Island,<br>Japan. 30 m alt.                           | 5                | A                  | AB543921         | AB543925             | A             | AB543934                                     | NK20100009a –<br>NK20100009e |             |
| 2                                          | Taihogawa River, Okinawajima Island,<br>Japan. 200 m alt.                             | 6                | B                  | AB543921         | AB543926             | B             | AB543935                                     | NK20100004a –<br>NK20100004f |             |
| 3                                          | Haramatagawa River, Okinawajima Island,<br>Japan. 180 m alt.                          | 4                | C                  | AB543921         | AB543927             | B             | AB543935                                     | NK20100006a –<br>NK20100006d |             |
| 4                                          | Hijigawa River, Okinawajima Island, Japan.<br>150 m alt.                              | 3                | C                  | AB543921         | AB543927             | B             | AB543935                                     | NK20100007a –<br>NK20100007c |             |
| 5                                          | Ukagawa River, Okinawajima Island,<br>Japan. 140 m alt.                               | 3                | C                  | AB543921         | AB543927             | B             | AB543935                                     | NK20100008a –<br>NK20100008c |             |
| 6                                          | Arakawa River, Okinawajima Island, Japan.<br>160 m alt.                               | 4                | B                  | AB543921         | AB543926             | B             | AB543935                                     | NK20100005a –<br>NK20100005d |             |
| 7                                          | Akirikamigawa River, Tokunoshima Island,<br>Japan. 200 m alt.                         | 6                | D                  | AB543920         | AB543925             | C             | AB543936                                     | NK20100003a –<br>NK20100003f |             |
| 8                                          | Kawauchigawa River, Amamioshima Island,<br>Japan. 80 m alt.                           | 2                | D                  | AB543920         | AB543925             | C             | AB543936                                     | NK20100002a –<br>NK20100002b |             |
| 9                                          | Sumiyogawa River, Amamioshima Island,<br>Japan. 100 m alt.                            | 5                | D                  | AB543920         | AB543925             | C             | AB543936                                     | NK20100001a –<br>NK20100001e |             |
| <i>Solenogyne bellioides</i> Cass.         |                                                                                       |                  |                    |                  |                      |               |                                              |                              |             |
| 10                                         | 4.7 km south-east of Nevertire on Route 32,<br>New South Wales, Australia. 335 m alt. | 3                | E                  | AB543924         | AB543928             | D             | AB543933<br>AB604756<br>AB604757             | NK20100010a –<br>NK20100010c |             |
| <i>Solenogyne dominii</i> L.G.Adams        |                                                                                       |                  |                    |                  |                      |               |                                              |                              |             |
| 11                                         | 20 km east of Dadswells Bridge on Western<br>Highway, Victoria, Australia. 260 m alt. | 2                | F                  | AB543923         | AB543929             | E             | AB543932<br>AB604758                         | NK20100011a –<br>NK20100011b |             |
| <i>Solenogyne gunnii</i> (Hook.f.) Cabrera |                                                                                       |                  |                    |                  |                      |               |                                              |                              |             |
| 12                                         | Glen Waverlay Garrison Drive, Melbourne,<br>Victoria, Australia. 80 m alt.            | 4                | G                  | AB543922         | AB543930             | F             | AB543931<br>AB604759<br>AB604760<br>AB604761 | NK20100012a –<br>NK20100012d |             |

\*For collection localities in the maps, see Figures 1, 2.

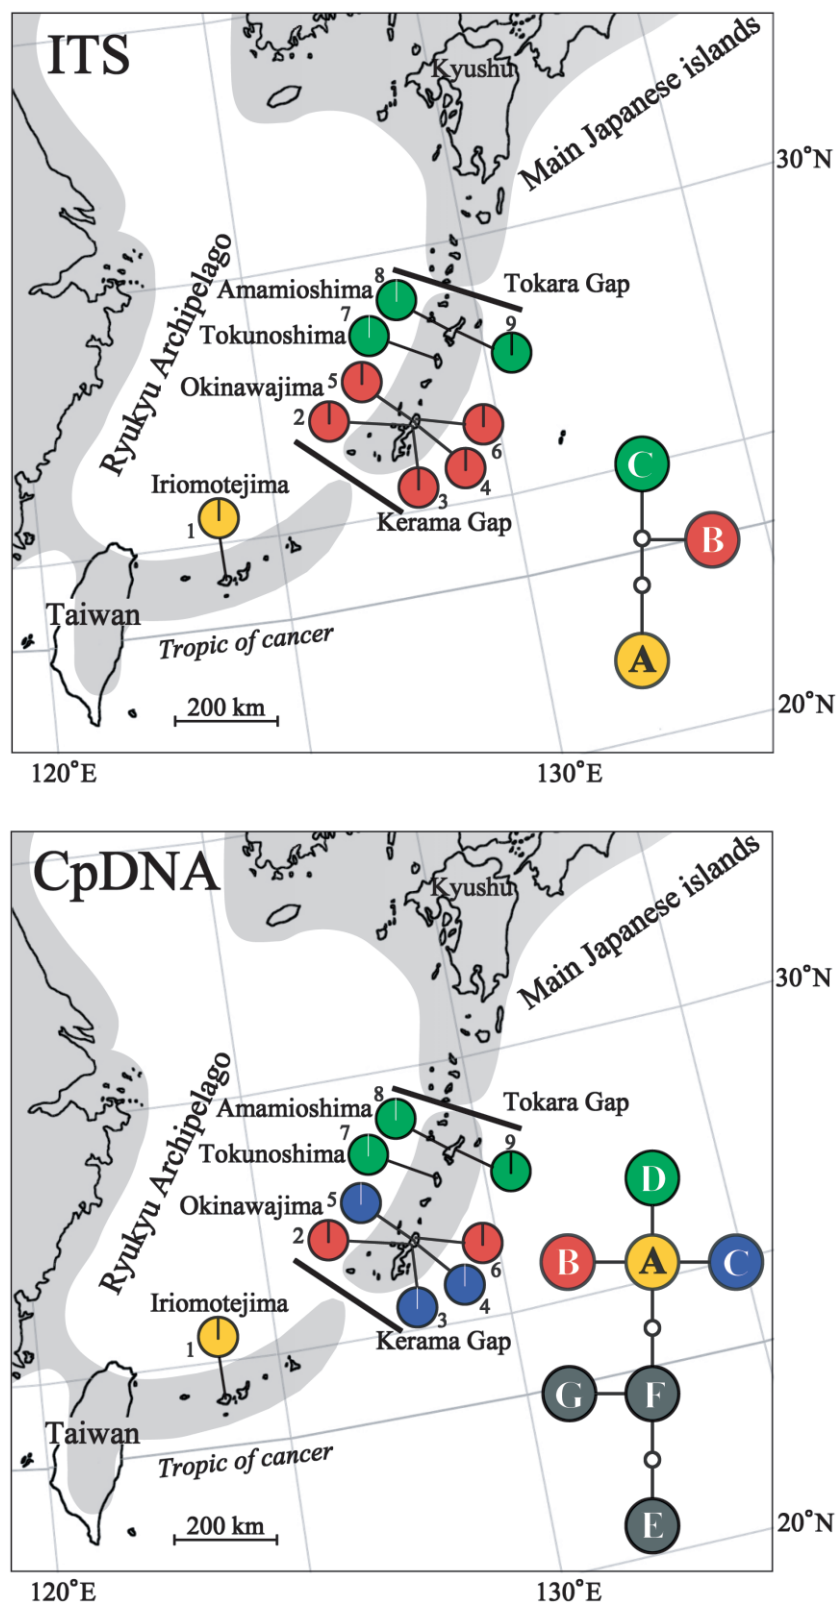



**Figure 2.** Geographical distributions of the internal transcribed spacer (ITS) types (A–C) and chloroplast DNA (cpDNA) haplotypes (A–D) of *Solenogyne mikadoi* in the Ryukyu Archipelago and their statistical parsimony networks. CpDNA haplotypes E, F, and G were found in *S. bellioides*, *S. dominii*, and *S. gunnii*, respectively. Small open circles indicate hypothetical (i.e. extinct or not sampled) types, and each line connecting the ITS and cpDNA types indicates one mutational change. The numbers indicate the collection localities; for details, see Table 1. Shaded areas in the map indicate land configuration in the early Pleistocene after splitting of the land bridge by the formation of the Tokara and Kerama gaps (Ota, 1998).

(Davis, 1950; Cabrera, 1966; Adams, 1979) and some studies have synonymized *Solenogyne* with *Lagenophora* (Bentham, 1867; Maiden & Betche, 1916; Drury, 1974). Therefore, to represent an antitropical distribution, the monophyly of *Solenogyne* needs to be demonstrated. *Lagenophora* comprises 15–36 species and is broadly distributed in India, South-east and East Asia, Australia, New Zealand, the Pacific islands, and Central and South America (Cabrera, 1966; Porteners & Brown, 1992; Mabberley, 1997; Mill, 1999). *Lagenifera* Cass. is an etymological variant of *Lagenophora*, and the latter is the conserved name for this genus (Australian National Botanic Gardens, 2009). Although *S. mikadoi* was once named *L. mikadoi* (Koidz.) Koidz. ex H. Koyama (Koyama, 1995), the two genera are morphologically distinct; in *Solenogyne*, ray florets are tubular and the achenes have neither beaks nor glands, while in *Lagenophora*, ray florets are ligulate and the achenes have glandular beaks (Davis, 1950; Cabrera, 1966; Adams, 1979). However, their phylogenetic relationship has not been studied using molecular data. Molecular phylogenetic studies can reveal intercontinental disjunct distributions and can provide information on the timing of the onset of disjunctions (Vijverberg, Mes & Bachmann, 1999; Xiang *et al.*, 2000; Givnish & Renner, 2004; Barker *et al.*, 2007; Namoff *et al.*, 2010; Rowe *et al.*, 2010). In previous studies, it was found that some taxa, which had been assumed to be typical examples of intercontinental disjunct distributions, were not monophyletic (Soltis *et al.*, 1991; Qiu, Chase & Parks, 1995; Soltis & Kuzoff, 1995; Soltis, Xiang & Hufford, 1995; Kim & Jansen, 1998), hence reinforcing the need for phylogenetic analyses of taxa exhibiting global scale disjunct distributions. Antitropical distributions for vascular plants in the Ryukyu Archipelago and eastern Australia have not previously been tested with molecular phylogenies.

In the Ryukyu Archipelago, the distribution of *S. mikadoi* is scattered on four islands and their mode of migration into the archipelago and range expansion is also of interest. The archipelago warrants attention from a biogeographical perspective because of the geohistory of island connections and separations (Ota, 1998; Otsuka, Ota & Hotta, 2000; Kimura, 2002a; Nakamura *et al.*, 2009, 2010). These islands

are of continental origin, and represent exposed portions of the Ryukyu Cordillera. This region underwent extensive changes in land configuration during the Cenozoic as a consequence of the subduction of the Philippine plate at the Ryukyu trench and subsidence of the Ryukyu trough (Ota, 1998), leading to crustal deformation and faulting. In addition, climatic oscillations have resulted in eustatic sea level changes. In the Neogene, the Ryukyu region formed the eastern margin of the East Asian continent. Subsequently, the island arc began to take its present day shape (Ota, 1998). Any discussion on plant migratory processes requires consideration of this geohistory.

In the present study, we conducted molecular phylogenetic analyses based on nuclear ribosomal DNA (nrDNA) and chloroplast DNA (cpDNA) sequences, aiming to: (1) test the Ryukyu–Australia antitropical distribution of *Solenogyne*; (2) discuss its onset timing and causes; and (3) elucidate the migratory processes of *S. mikadoi* in the Ryukyu Archipelago.

## MATERIAL AND METHODS

### PLANT MATERIALS AND DNA SAMPLING

*Solenogyne mikadoi* is reported from nine river systems (Yokota & Hiraiwa, 2006) and we collected samples from almost all known localities, from one river system on Iriomotejima, from five on Okinawajima, from one on Tokunoshima, and from two on Amamioshima, respectively (Table 1). Because of the scarcity of the plants in each river system, we collected two to six plants per river system; in total 38 plants were collected. For the three Australian species, the collection of plants from many localities was difficult because the known sites (gathered from herbarium specimen data) were scattered very widely. Instead, multiple plants were collected from one locality for each species (three plants for *S. bellioides*, two for *S. dominii*, and four for *S. gunnii*, respectively; Fig. 1, Table 1). The three species were collected from different localities where only one species occurred; this was carried out to avoid collecting possible hybrids between them in mixed populations (Adams, 1979). These 47 plants in total were used for the analyses of nrDNA and cpDNA sequences.

To test the monophyly of *Solenogyne*, the internal transcribed spacer (ITS) region of nrDNA was used.

For *Lagenophora*, eight species and one variety were analyzed (Table 2). We collected three species: *Lagenophora gracilis* Steetz, *Lagenophora huegelii* Benth., and *Lagenophora lanata* A.Cunn. For the other five species and the variety, the ITS sequences were obtained from databases (DDBJ/EMBL/GenBank). The analysis included all species of *Lagenophora* reported from Japan (one species; Hatusima, 1975), Australia (four species; Porteners & Brown, 1992; Australian National Botanic Gardens, 2009), and surrounding areas, namely, Taiwan, continental China, India, New Zealand, and Java (Hooker, 1881; Backer & van den Brink, 1965; Soejima & Peng, 1998; Chen & Jin, 2005), except *Lagenophora pinnatifida* Hook.f., which is endemic to New Zealand (five species, Allan, 1982). In addition, the analysis included 25 species from 24 Astereae genera (Table 2) to ensure that *Lagenophora* is the sister genus of *Solenogyne* and appropriate to test the monophyly of *Solenogyne*. It was reported that the major genera of Astereae are clearly separated into two groups based on the ITS sequence (Noyes & Rieseberg, 1999); we selected the genera from the group that included *Lagenophora*. We added some other genera not included in the above study, referring to the results of a phylogenetic study of the tribe based on the ITS sequences (Wagstaff & Breitwieser, 2002). The ITS sequences for genera other than *Solenogyne* and *Lagenophora* were obtained from databases (DDBJ/EMBL/GenBank). As outgroups, we selected *Chilotrimum diffusum* and *Olearia argophylla* of basal Astereae clades (Noyes & Rieseberg, 1999) and phylogenetic trees were rooted on *C. diffusum*.

Voucher specimens of our collections were deposited in the herbarium of the Faculty of Science, University of the Ryukyus (RYU; Tables 1, 2).

#### DNA EXTRACTION, AMPLIFICATION, AND SEQUENCING

Total DNA was isolated from leaf tissue by using the cetyl trimethyl ammonium bromide method of Doyle & Doyle (1987). The following three molecular markers were amplified using polymerase chain reaction (PCR): the ITS region (including ITS1 and ITS2 spacer regions and the 5.8S rRNA gene) of nrDNA, the intergenic spacer of the *atpB* and *rbcL* genes (*atpB-rbcL*), and the 3' intron of the *trnK* gene (*trnK3'* intron) of cpDNA. The PCR mixtures consisted of the reagents: 10–40 ng of genomic DNA, 1.0 unit of rTaq polymerase (TOYOBO, Osaka, Japan), 10 µL of rTaq DNA polymerase buffer containing 1.5 mM magnesium chloride, 0.2 mM of each dNTP, 0.25 µM of each primer, and 70.5 µL sterile water. With respect to the primers used for PCR amplification and the PCR cycle conditions: for the ITS region,

we used universal primers 1 and 4 (White *et al.*, 1990), with an initial template denaturation at 95 °C for 5 min. This was followed by one cycle at 97 °C for 2 min, 50 °C for 1 min, and 72 °C for 1 min; 25 cycles at 95 °C for 1 min, 50 °C for 2 min, and 72 °C for 3 min; and a final extension at 72 °C for 10 min. For the *atpB-rbcL* spacer, the primers *atpB2F* and *rbcL2R* were used (Nakamura *et al.*, 2006), with an initial template denaturation at 95 °C for 5 min. This was followed by 25 cycles at 95 °C for 1 min, 57 °C for 1 min, and 72 °C for 2 min, and a final extension at 72 °C for 10 min (Nakamura *et al.*, 2007). For the *trnK3'* intron region, the universal primers *trnK-3914F* and *trnK-2R* (Johnson & Soltis, 1994) were used, with an initial template denaturation at 95 °C for 5 min, followed by 30 cycles at 94 °C for 1.5 min, 51 °C for 2 min, 72 °C for 3 min, and a final extension at 72 °C for 10 min. The PCR fragments were purified with shrimp alkaline phosphatase and exonuclease I (Promega). These were used as templates for cycle sequencing reactions, and direct sequencing was performed in accordance with the manufacturer's protocol on an ABI Prism 3730 DNA analyzer (Applied Biosystems). The sequences were deposited in the DDBJ/EMBL/GenBank databases (Tables 1, 2).

#### ANALYTICAL SCHEME AND DNA DATA SETS

To test the monophyly of *Solenogyne*, the ITS data set of *Solenogyne* plus the other Astereae genera was constructed (henceforth the Astereae data set) and analyzed based on Bayesian and maximum parsimony (MP) criteria. Because there was no variation in ITS within populations (Table 1), we used a single sample from each population as sufficient to test the monophyly of *Solenogyne*. To elucidate phylogenetic relationships among *Solenogyne* species and their divergence times, ITS and cpDNA data sets comprising only *Solenogyne* were made (including all the samples in Table 1; henceforth the *Solenogyne* data set). The analyses of the *Solenogyne* data set were conducted using Bayesian methods implemented in BEAST, version 1.6.1 (Drummond *et al.*, 2006), which estimates the root of a phylogeny without using an outgroup by enforcing the (relaxed) molecular clock constraint (Drummond & Rambaut, 2007). BEAST calculates the proportion of trees that have a particular root based on Markov chain Monte Carlo (MCMC) simulation, and obtains a posterior probability for this root position. The ITS and cpDNA *Solenogyne* data sets were also used to elucidate phylogeny of *S. mikadoi* samples and their divergence times.

In the data set construction, the DNA sequences were aligned using CLUSTALX version 1.8 (Thompson *et al.*, 1997) and then adjusted manually. The combinability of the *atpB-rbcL* and *trnK3'* intron

**Table 2.** Subtribe assignment, sampling localities and GenBank accession number of internal transcribed spacer (ITS) nuclear ribosomal DNA sequences of 34 taxa from 25 genera of the tribe Astereae

| Species                                                                      | Subtribe* | Locality** or source                                     | ITS accession |
|------------------------------------------------------------------------------|-----------|----------------------------------------------------------|---------------|
| <i>Lagenophora</i> Cass.                                                     |           |                                                          |               |
| <i>L. cuneata</i> Petrie                                                     | LAG       | New Zealand, South Island                                | EU352246      |
| <i>L. gracilis</i> Steetz                                                    | LAG       | Australia, Queensland. 650 m alt.<br>NK20100013 (RYU)    | AB550254      |
| <i>L. huegelii</i> Benth.                                                    | LAG       | Australia, Victoria. 260 m alt. NK20100014<br>(RYU)      | AB550255      |
| <i>L. lanata</i> A.Cunningham                                                | LAG       | Japan, Amamioshima Island 670 m alt.<br>NK20100015 (RYU) | AB550256      |
| <i>L. panamensis</i> S. F. Blake                                             | LAG       | Panama, Chiriqui                                         | AF046965      |
| <i>L. pumila</i> (G.Forst.) Cheeseman                                        | LAG       | New Zealand, South Island                                | AF422124      |
| <i>L. pumila</i> (G.Forst.) Cheeseman                                        | LAG       | New Zealand, S. A. Norton 598 (NO)                       | DQ479037      |
| <i>L. pumila</i> (G.Forst.) Cheeseman                                        | LAG       | New Zealand                                              | EU352244      |
| <i>L. stipitata</i> (Labill.) Druce var. <i>stipitata</i>                    | LAG       | Australia                                                | AB435145      |
| <i>L. stipitata</i> (Labill.) Druce var. <i>montana</i><br>(Hook.f.) Cabrera | LAG       | New Zealand                                              | EU352243      |
| <i>L. strangulata</i> Colenso***                                             | LAG       | New Zealand, North Island, Erua                          | EU352245      |
| Other genera                                                                 |           |                                                          |               |
| <i>Aster amellus</i> L.                                                      | AST       | Russia, Northern Caucasus                                | AF046961      |
| <i>Baccharis dracunculifolia</i> DC.                                         | BAC       | Bolivia, La Paz                                          | AF046958      |
| <i>Bellis perennis</i> L.                                                    | BEL       | Bolivia, La Paz                                          | AF046950      |
| <i>Brachycome breviscapis</i> C.R.Carter                                     | BRA       | Australia, South Australia                               | AB435100      |
| <i>Calotis dentex</i> R.Br.                                                  | BRA       | Australia, Queensland                                    | AF046956      |
| <i>Celmisia mackaui</i> Raoul                                                | HIN       | New Zealand, South Island                                | AF422115      |
| <i>Chiliodactylon diffusum</i> (Forst.) O.Kuntze                             | HIN       | Chile, Cape Horn Island                                  | AF046945      |
| <i>Conyza gouanii</i> (L.) Willd.                                            | CON       | Tanzania, Iringa                                         | AF046948      |
| <i>Conyza pyrrhopappa</i> A.Rich.                                            | CON       | Tanzania, Tanga                                          | AF046953      |
| <i>Crinitaria linosyris</i> (L.) Less.                                       | AST       | Russia, Saratov                                          | AF046949      |
| <i>Damnania vernicosa</i> (Hook.f.) Given                                    | HIN       | New Zealand, Campbell Island                             | AF422119      |
| <i>Diplostegium rupestre</i> (H.B.K.) Wedd.                                  | HIN       | Ecuador, Napo                                            | AF046962      |
| <i>Kalimeris integrifolia</i> Turcz. ex DC.                                  | AST       | China, Jiangsu                                           | AF046960      |
| <i>Laennecia sophiifolia</i> (Kunth) Nesom                                   | POD       | Mexico, Oaxaca                                           | AF046964      |
| <i>Minuria integerrima</i> (DC.) Benth.                                      | POD       | Australia, Queensland                                    | AF046957      |
| <i>Myriactis humilis</i> Merr.                                               | LAG       | Taiwan, Pingtung Hsien                                   | AF046959      |
| <i>Nidorella resedifolia</i> DC.                                             | GRA       | South Africa, Cape                                       | AF046952      |
| <i>Olearia argophylla</i> (Labill.) F.Muell. ex<br>Benth.                    | HIN       | Australia, New South Wales                               | AF046944      |
| <i>Oritrophium peruvianum</i> (Lam.) Cuatrec.                                | HIN       | J. Jaramillo <i>et al.</i> 21020 (QCA)                   | DQ479117      |
| <i>Pachystegia insignis</i> (Hook.f.) Cheeseman                              | HIN       | New Zealand, South Island                                | AF422132      |
| <i>Pleurophyllum speciosum</i> Hook.f.                                       | HIN       | New Zealand, Campbell Island                             | AF422133      |
| <i>Podocoma notobellidiastrum</i> (Griseb.)<br>Nesom                         | POD       | Paraguay, Caazapa                                        | AF046963      |
| <i>Psiadia punctulata</i> (DC.) Vatke                                        | BAC       | South Africa, Transvaal                                  | AF046954      |
| <i>Pteronia incana</i> (Burm.) DC.                                           | HIN       | South Africa, Cape                                       | AF046947      |
| <i>Vittadinia australis</i> A.Rich.                                          | POD       | New Zealand, South Island                                | AF422140      |

\*Subtribes *sensu* Nesom & Robinson (2007): AST, Asterinae; BAC, Baccharidinae; BEL, Bellidinae; BRA, Brachycominae; CHR, Chrysopsidinae; CON, Conyzinae; FEL, Feliciinae; GRA, Grangeinae; HIN, Hinterhuberinae; LAG, Lageniferinae; MAC, Machaerantherinae; POD, Podocomae; SOL, Solidagininae; SYM, Symphyotrichinae.

\*\*For cited sequences, localities were referred from Noyes & Rieseberg (1999), Wagstaff & Breitwieser (2002), and the DDBJ/EMBL/GenBank databases.

\*\*\**Lagenophora strangulata* is synonymized with *Lagenophora petiolata* Hook.f. in Cheeseman (1925).

regions was determined with the incongruence length difference test ( $P = 1.00$ ) (Farris *et al.*, 1994) using the partition homogeneity test implemented in PAUP\* version 4.0b10 (Swofford, 2002) and subsequent analyses were conducted on the combined data.

#### TESTS OF DNA SUBSTITUTION MODEL AND MOLECULAR CLOCK HYPOTHESIS

Estimation of the appropriate DNA substitution models were conducted based on the Akaike information criterion using MODELTEST version 3.7 (Posada & Crandall, 1998); the model GTR+I+G was selected for the Astereae data set of ITS, the model TrN (also called TN93 in some software) for the *Solenogyne* data set of ITS, and the model HKY for the *Solenogyne* data set of cpDNA. Note the model TrN was also selected for the Astereae data set by hierarchical likelihood rate tests implemented in MODELTEST.

The molecular clock hypothesis was tested for each data set using the two-cluster test (Takezaki, Rzhetsky & Nei, 1995) and a molecular clock likelihood ratio test (LRT) (Felsenstein, 1988). The two-cluster test, implemented in LINTREE (Takezaki *et al.*, 1995), examines whether there are significant differences in substitution rates in sister lineages in a given tree. Identical sequences in each data set were collapsed (Quek *et al.*, 2004) and Neighbour-joining trees were constructed using the model TrN, because the models GTR+I+G and HKY were not implemented in the LINTREE software and the model TrN was similar to the models. The hypothesis of rate constancy for all sequences in a tree was tested simultaneously by  $Q$ -values of the  $U$ -statistic, which approximately follows a  $\chi^2$  distribution with  $n - 1$  degrees of freedom (d.f.), where  $n$  is the number of sequences. The molecular clock hypothesis was rejected at the significance level of  $P = 0.05$  for the Astereae data set for ITS ( $Q = 1103.8$ , d.f. = 41,  $P < 0.0001$ ) but not rejected for the *Solenogyne* data sets (ITS,  $Q = 7.8$ , d.f. = 5,  $P = 0.17$ ; cpDNA,  $Q = 3.0$ , d.f. = 6,  $P = 0.70$ ). The molecular clock LRT was conducted using PAUP\*, by comparing the log likelihood ( $L$ ) of maximum likelihood trees with and without assuming a molecular clock, based on the determined DNA substitution models. The likelihood ratio was calculated as  $2(\ln L_{\text{noclock}} - \ln L_{\text{clock}})$  and assumed to follow a  $\chi^2$  distribution with  $n - 2$  degrees of freedom, where  $n$  is the number of sequences (Muse & Weir, 1992). Identical sequences in each data set were collapsed in the analyses. The results of the LRT agreed with the results of the two-cluster test. The molecular clock hypothesis was rejected for the Astereae data set ( $-\ln L_{\text{noclock}} = 4587.48$ ,  $-\ln L_{\text{clock}} = 4647.28$ , LRT = 119.60, d.f. = 40,  $P < 0.0001$ ) but not rejected

for the *Solenogyne* data set (ITS,  $-\ln L_{\text{noclock}} = 1064.83$ ,  $-\ln L_{\text{clock}} = 1069.60$ , LRT = 9.54, d.f. = 4,  $P = 0.05$ ; cpDNA,  $-\ln L_{\text{noclock}} = 2389.11$ ,  $-\ln L_{\text{clock}} = 2393.57$ , LRT = 8.93, d.f. = 5,  $P = 0.11$ ). Note, however, that the *Solenogyne* data set for ITS showed the marginal value of  $P = 0.05$ .

#### PHYLOGENETIC ANALYSIS BASED ON ASTEREAE DATA SET

The first Bayesian phylogenetic analysis was conducted using MrBayes version 3.1.2 (Ronquist & Huelsenbeck, 2003) and the second analysis was conducted using BEAST version 1.6.1 (Drummond *et al.*, 2006). MrBayes does not consider across-lineage variability of substitution rate, whereas BEAST can incorporate this into tree construction (Drummond & Rambaut, 2007). Both the complex (GTR+I+G) and simple (TrN) models were used for comparison.

With MrBayes, two separate runs of Metropolis-coupled Metropolis-coupled Markov chain Monte Carlo (MCMCMC) analyses were performed based on the models of GTR+I+G or TrN, with a random starting tree and four chains (one cold and three heated). The MCMCMC length was two million generations, and the chain was sampled every 100th generation from the cold chain. The mixing and convergence of the MCMC chains of the two runs was assessed by inspection of the trace plots of parameters using TRACER version 1.5.0 (Drummond & Rambaut, 2007); the first 2000 sample trees (10% of the total 20 000 sampled trees) were discarded as burn-in. After the burn-in, the effective sample sizes (ESS) of all parameters were  $> 200$ , indicating that the analyses sampled the posterior distributions of each parameter satisfactorily, and the values of Average Standard Deviation of Split Frequency (ASDSF) were below 0.01. The 50% majority rule consensus tree of all the post-burn-in trees was generated using TREEVIEW version 1.6.6 (Page, 1996).

To determine the models for BEAST analyses, we compared clock and relaxed-clock models to avoid over-parameterization although the molecular clock hypothesis was rejected (see above), and compared Yule and birth-death speciation priors for the branching rates. We used the Bayes factor (BF) [i.e. the ratio of the marginal likelihoods ( $L$ ) of two models] (Kass & Raftery, 1995; Suchard, Weiss & Sinsheimer, 2001). The marginal likelihood for each model was estimated by calculating the harmonic mean of the sampled likelihoods from a MCMC chain with 1000 bootstrap replications. The calculations were performed using BEAST and TRACER version 1.5. An unweighted pair-group method of arithmetic averages (UPGMA) was used to construct the starting trees and the MCMC chain length was 10 million (with 10% burn-



in). Evidence against the null model (i.e. the one with lower marginal likelihood) is indicated by  $2\ln(\text{BF}) > 2$  (positive) and  $> 10$  (very strong) (Kass & Raftery, 1995). As a relaxed-clock model, we used an uncorrelated lognormal distribution (UCLN) model for rate variation among lineages, which was, in a simulation study, robust in rate estimation even when the data are generated based on a lognormally autocorrelated rate variation model (Drummond *et al.*, 2006). The strict clock and UCLN models were compared under the conditions of the Yule model plus the GTR+I+G or TrN models; the UCLN model was selected [under the GTR+I+G model,  $\ln L = -4676.329$  in the strict model,  $\ln L = -4642.553$  in the UCLN model,  $2\ln(\text{BF}) = 67.552$ ; under the TrN model,  $\ln L = -4965.295$  in the strict model,  $\ln L = -4932.799$  in the UCLN model,  $2\ln(\text{BF}) = 64.990$ ]. In addition, the frequency histogram of the SD of the uncorrelated lognormal relaxed clock (ucld.stdev parameter) did not include or abut 0 under the GTR+I+G and TrN models, hence rejecting a strict molecular clock (Drummond *et al.*, 2007). The Yule and the birth-death models were compared under the conditions of the UCLN model plus the GTR+I+G or TrN models. The Yule model is parameterized by a rate of lineage birth (i.e. bifurcation) and the birth-death model is parameterized by lineage birth and death rates. Under the GTR+I+G model, both models indicated insignificantly different marginal likelihood values [ $\ln L = -4642.553$  in the Yule model,  $\ln L = -4643.046$  in the birth-death model,  $2\ln(\text{BF}) = 0.986$ ] and the Yule model was selected because it is simpler than the birth-death model. Under the TrN model, the birth-death model was selected [ $\ln L = -4932.799$  in the Yule model,  $\ln L = -4931.390$  in the birth-death model,  $2\ln(\text{BF}) = 2.818$ ]. Based on these results, the BEAST analyses used the UCLN and Yule models with the GTR+I+G model, and the UCLN and birth-death models with the TrN model. Empirical base frequency setting was applied, and the UPGMA starting tree was used. Default priors were used for the remaining parameters. MCMC chains were run for 10 million generations and sampled every 1000 generations. We ran two separate analyses. We checked the convergence of all parameters using TRACER and the first 1000 of the 10 000 sampled generations in each run were discarded as burn-in. The log files from the two runs were combined using LOGCOMBINER version 1.5.4 (Drummond & Rambaut, 2007), and the ESS of all parameters were  $> 200$  after the burn-in. A maximum clade credibility tree was estimated with a burn-in of 10% of the sampled trees and a posterior probability limit of 0.5 by TREEANNOTATOR version 1.5.4 (Drummond & Rambaut, 2007), and generated by FIGTREE version 1.3.1 (Drummond & Rambaut, 2007).

The MP analysis was conducted using PAUP\*. Indels were treated as missing data. Characters were treated as unordered, and character transformations were weighted equally. The branch collapse option was set to collapse at a minimum length of zero. A heuristic parsimony search was performed with 200 replicates of random additions of sequences, with the ACCTRAN character optimization, tree bisection–reconnection (TBR) branch swapping, MULTREES, and STEEPEST DESCENT options on. Statistical support for each clade was assessed by bootstrap analysis (Felsenstein, 1985). One thousand replicates of heuristic searches, with the TBR branch swapping and MULTREES options off, were performed to calculate bootstrap values.

#### PHYLOGENETIC AND DATING ANALYSIS OF *SOLENOGYNE* DATA SETS

To elucidate phylogenetic relationships among the four *Solenogyne* species and to conduct molecular dating analyses simultaneously based on ITS and cpDNA, the *Solenogyne* data sets were analyzed using \*BEAST (Heled & Drummond, 2010) implemented in BEAST version 1.6.1. \*BEAST conducts multispecies coalescent analysis to estimate a species tree that is most probable given the unlinked multi-locus sequence data (i.e. the ITS data and the combined cpDNA data). Multispecies coalescent analysis considers that gene trees are embedded in a shared species tree by following the stochastic coalescent process. This analysis requires multiple samples per species to examine coalescent events for that species (Heled & Drummond, 2010). Because we could not use multiple samples for most *Lagenophora* species except *Lagenophora pumila*, and because the monophyly of *Solenogyne* was indicated by the analyses of the Astereae data set (see Results), we used only the *Solenogyne* samples in this analysis. Thus, the root of a phylogeny was estimated without using an outgroup by enforcing the molecular clock constraint (Drummond & Rambaut, 2007).

The models of TrN and HKY were used for ITS and cpDNA data, respectively, with empirical base frequency setting and UPGMA starting trees. The piecewise linear population size model, which is more realistic for natural populations than piecewise constant population size model (Heled & Drummond, 2010), was used. Because the *Solenogyne* data set for ITS showed the marginal value in the molecular clock LRT for the molecular clock hypothesis ( $P = 0.05$ ), we compared the strict clock and UCLN relaxed-clock models for ITS under the strict clock model for cpDNA and the Yule model using the BF. The result selected the simpler strict clock model [ $\ln L = -3480.868$  in the strict model,  $\ln L = -3480.214$  in

the UCLN model,  $2\ln(\text{BF}) = 1.306$ ]. Also, the frequency histogram of the *ucln.stdev* parameter abutted 0, failing to reject a strict molecular clock (Drummond *et al.*, 2007). The Yule and the birth-death models were compared under the conditions of the strict clock models for ITS and cpDNA; the simpler Yule model was selected [ $\ln L = -3480.868$  in the Yule model,  $\ln L = -3480.393$  in the birth-death model,  $2\ln(\text{BF}) = 0.948$ ]. Based on these preliminary tests, the multilocus estimation of species tree was performed under the strict clock models for ITS and cpDNA and the Yule model.

There are no fossils to calibrate the molecular clock for *Solenogyne* and its allied taxa, and thus divergence times were calculated using reported substitution rates. There are multiple estimates of ITS substitution rates in Asteraceae with a minimum generation time of 2–3 years. These range from  $7.83 \times 10^{-9}$  (the highest) to  $2.51 \times 10^{-9}$  (the lowest) substitutions per site per year (Richardson *et al.*, 2001; Kay, Whittall & Hodges, 2006). Because it is inappropriate to apply one of these rates from a different lineage, we used a normal distribution prior with the mean ( $5.17 \times 10^{-9}$ ) equal to the mean of the highest and lowest values and with a SD of  $1.36 \times 10^{-9}$ , which includes the highest and lowest values in the 95% range (mean  $\pm 1.69$  SD) of the distribution. In the analysis of cpDNA data, we used a normal distribution prior with the mean ( $4.36 \times 10^{-9}$ ) and SD of  $2.29 \times 10^{-9}$ , which covered a range from  $4.87 \times 10^{-10}$  to  $8.24 \times 10^{-9}$  (the lowest and highest rates for cpDNA noncoding region of plants with a minimum generation time of 2–3 years, Richardson *et al.*, 2001) in the 95% range of the distribution.

MCMC chains were run for 30 million generations and sampled every 1000 generations. We ran two separate analyses. We checked the convergence of all parameters using TRACER and the first 3000 of the 30 000 sampled generations in each run were discarded as burn-in. The log files from the two runs were combined, and the ESS of all parameters were greater than 200 after burn-in. A maximum clade credibility tree was estimated with a burn-in of 10% of the sampled trees and a posterior probability limit of 0.5.

#### DIVERGENCE TIME ESTIMATION FOR *S. MIKADOI*

Bayesian estimation of divergence times among the lineages of *S. mikadoi* was performed based on each ITS and cpDNA sequence, using BEAST. The analyses employed the strict clock models and the models TrN for ITS and HKY for cpDNA with empirical base frequency settings. For ITS and cpDNA substitution rates, the normal distribution priors described above

were used. The analyses used a coalescent tree prior, which is adequate to study intraspecific diversification (Drummond *et al.*, 2007), under the most simple assumption of a constant population size. Because the coalescent tree prior is suited for within species data, the sequences of the other three *Solenogyne* species were excluded from the analyses, and the root of a phylogeny was estimated by enforcing the molecular clock constraint. Random starting trees were used for ITS and cpDNA. Default priors were used for the remaining parameters. MCMC chains were run for 10 million generations and sampled every 1000 generations. We ran two separate analyses for each ITS and cpDNA. We checked the convergence of all parameters using TRACER and the first 1000 of the 10 000 sampled generations in each run were discarded as burn-in. The log files from the two runs were combined, and the ESS of all parameters were greater than 200 after the burn-in. A maximum clade credibility tree was estimated with a burn-in of 10% of the sampled trees and a posterior probability limit of 0.5.

#### PHYLOGEOGRAPHICAL ANALYSIS OF *S. MIKADOI*

A statistical parsimony network, suited to the analysis of intraspecific and/or recently diverged genetic lineages, was estimated based on each of the *Solenogyne* data sets of ITS and cpDNA. The analyses were conducted by a 95% parsimony criterion using TCS version 1.21 (Clement, Posada & Crandall, 2000). Indels were scored as binary states indicating presence/absence, in accordance with the simple indel coding strategy of Simmons & Ochoterena (2000). The other three *Solenogyne* species were used as outgroup taxa because an Australian origin of *Solenogyne* was indicated by the analyses of the Astereae data set (see Discussion).

## RESULTS

#### DATA MATRIX CHARACTERISTICS

The length of the ITS sequences was in the range 627–634 bp among *Solenogyne* and the other species, and the aligned sequence length was 650 bp. In *Solenogyne*, 30 nucleotide substitutions were found in 29 variable sites. Within *S. mikadoi*, four nucleotide substitutions were found in four variable sites and three unique ITS types were found (A–C), and each of the three Australian *Solenogyne* species had an unique ITS type (D–F) (Table 1). The length of the *atpB-rbcL* spacer and *trnK3'* intron region was 994–1001 bp and 752 bp in the four *Solenogyne* species, and their alignment resulted in matrices of 1001 and 752 characters, respectively, resulting in the combined data of 1753 bp. Across all *Solenogyne* samples,

seven nucleotide substitutions and one length polymorphism were found. In all accessions of *S. mikadoi*, three nucleotide substitutions were found and four haplotypes (A–D) were recognized. Each of the three Australian species had one unique haplotype (E–G).

#### NRDNA PHYLOGENY OF *SOLENOGYNE* AND ALLIED GENERA

The 50% majority rule consensus tree by MrBayes based on the model TrN is depicted with mean branch length of all the post-burn-in trees and Bayesian posterior probabilities (*PP*) (Fig. 3).

The maximum clade credibility tree by BEAST based on the model TrN were topologically compatible with the 50% majority rule consensus tree (not shown). The MrBayes and BEAST analyses based on the model GTR+I+G indicated lower posterior probability values for some nodes but showed the same topologies (not shown) as the model TrN. In the MP analysis, 107 of 275 variable sites were parsimoniously informative in *Solenogyne* and the other *Astereae* taxa. Seventy-three equally parsimonious trees were obtained (709 steps, consistency index = 0.536, retention index = 0.666, rescaled consistency index = 0.357, homoplasy index = 0.464). The topology of the MP strict consensus tree (not shown) was compatible with those of the Bayesian trees by MrBayes and BEAST. The *PP* for clade support by BEAST based on the model TrN and bootstrap percentages (*BP*) by the MP analysis are shown on the 50% majority rule consensus tree (Fig. 3). In what follows, we consider clades supported by *BP* > 70 and/or *PP* > 0.95. The *Solenogyne* and *Lagenophora* samples together formed a clade ( $PP_{\text{MrBayes}}/PP_{\text{BEAST}}/BP = 0.99/0.99/51.3$ ), except *Lagenophora panamensis* S.F.Blake from Central America that fell in a clade containing a sample each of three other genera (1.0/0.96/ < 50). Within the *Solenogyne/Lagenophora* clade, all *Solenogyne* samples and *L. huegelii* formed a clade (1.0/1.0/84.7), and *Solenogyne* was monophyletic (1.0/0.97/53.2). Each species, *S. gunnii* (1.0/1.0/99.0), *S. dominii* (1.0/1.0/80.3), *S. bellioides* (0.97/0.99/68.5), and *S. mikadoi* (1.0/1.0/100), was monophyletic, and *S. dominii* and *S. bellioides* formed a monophyletic clade (1.0/1.0/82.6). In the *S. mikadoi* clade, a clade composed of plants from Amamioshima and Tokunoshima islands (0.98/1.0/62.1) and a clade of plants from Okinawajima Islands (0.96/0.99/61.6) clustered in a polytomy with the plant from Iriomotejima Island.

#### PHYLOGENY AND DIVERGENCE TIME OF *SOLENOGYNE*

Species phylogeny of the four *Solenogyne* species estimated using multispecies coalescent analysis based

on ITS and cpDNA is depicted with clade posterior probabilities above branches (Fig. 4). Clade depth indicates mean nodal age and bars indicate 95% highest posterior density (HPD) intervals for nodal ages. The phylogenetic tree was rooted at the branch separating *S. mikadoi* from the three Australian congeners (*PP* = 1.0). The three Australian species were monophyletic (*PP* = 0.98) and *S. bellioides* and *S. dominii* formed a clade (*PP* = 0.95). The estimated age of the most recent common ancestor (MRCA) of *Solenogyne* was 2.38 Mya (95% HPD interval = 0.93–4.16 Mya). The age of the MRCA of the three Australian species was 1.15 Mya (95% HPD interval = 0.30–2.21 Mya). The age of the MRCA of *S. bellioides* plus *S. dominii* was 0.63 Mya (95% HPD interval = 0.15–1.22 Mya).

#### DIVERGENCE TIME ESTIMATION FOR *S. MIKADOI*

The maximum clade credibility trees based on ITS and cpDNA are shown with clade posterior probabilities above branches (Fig. 5). Nodes with identical sequences are collapsed. Clade depth indicates mean nodal age (years) and nodes with *PP* ≥ 0.5 are annotated with the 95% HPD intervals for node ages by bars. The estimated age of the MRCA of *S. mikadoi* was 0.33 Mya (95% HPD interval = 0.03–0.75 Mya) based on ITS, and 0.13 Mya (95% HPD interval = 0.003–0.330 Mya) based on cpDNA. The ages of the MRCAs of terminal clades ranged 0.03–0.07 Mya (95% HPD interval = 0.00035–0.190 Mya) based on ITS, and 0.01–0.02 Mya (95% HPD interval = 0.00008–0.070 Mya) based on cpDNA.

#### PHYLOGEOGRAPHY BASED ON CPDNA

The geographical distribution of the ITS types and cpDNA haplotypes is shown in Figure 2, with their statistical parsimony networks. ITS type A was found in Iriomotejima Island, ITS type B was found in Okinawajima Island, and ITS type C was found in Tokunoshima and Amamioshima islands. In the statistical parsimony network, ITS type A and the other types B and C were connected with three mutational steps; ITS types B and C were distinguished from each other by two mutational steps. The ITS types of the Australian species *S. bellioides*, *S. dominii*, and *S. gunnii* (D–F, not shown) were not connected to the network of *S. mikadoi* by the 95% parsimony criterion. CpDNA haplotype A was found in Iriomotejima Island, haplotypes B and C were found in Okinawajima Island, and haplotype D was found in Tokunoshima and Amamioshima islands. In the statistical parsimony network, the four haplotypes of *S. mikadoi* were distinguished from each other by one mutational step. Haplotype A from Iriomotejima Island was found

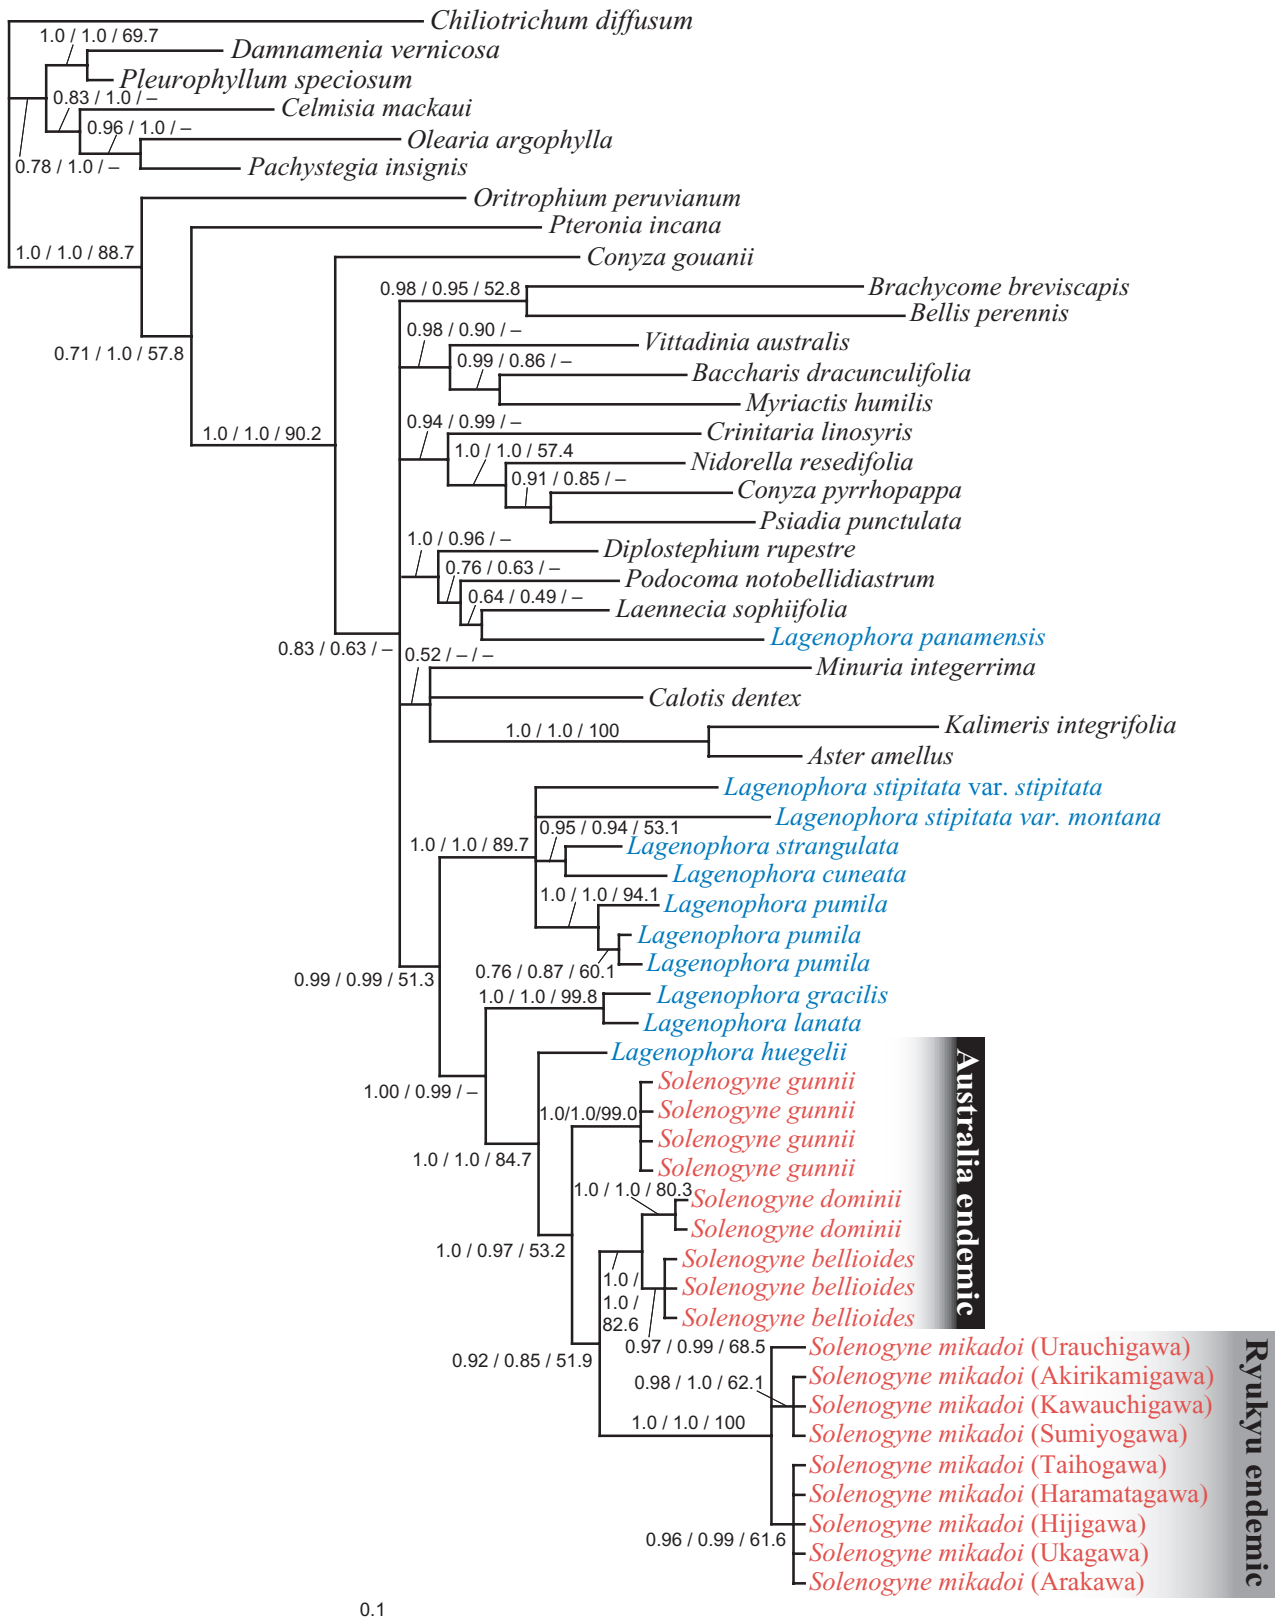



**Figure 3.** The 50% majority rule consensus tree of *Solenogyne*, *Lagenophora*, and 34 taxa from 25 genera of tribe Astereae by MrBayes based on internal transcribed spacer sequences under the model TrN. The analysis based on the model GTR+I+G resulted in the same topology (not shown). The maximum clade credibility trees by BEAST based on the models GTR+I+G and TrN and the maximum parsimony (MP) strict consensus tree were all topologically compatible (not shown). Numbers along the branches indicate Bayesian posterior probabilities (PP) with MrBayes and BEAST under the model TrN and bootstrap percentages (BP) by the MP analysis ( $PP_{\text{MrBayes}}/PP_{\text{BEAST}}/BP$ ).

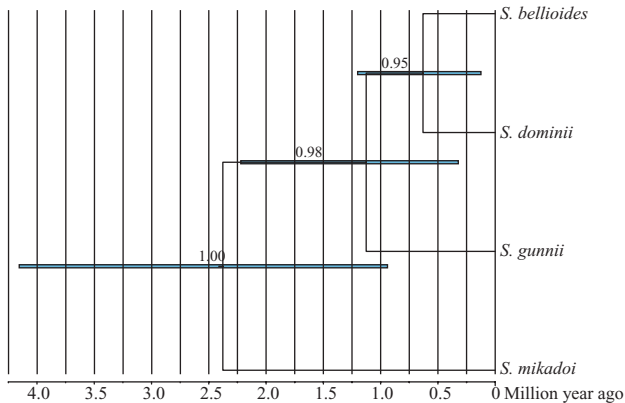

**Figure 4.** Species phylogeny of the four *Solenogyne* species estimated using multispecies coalescent analysis based on internal transcribed spacer (ITS) and chloroplast DNA (cpDNA). Clade posterior probabilities (PP) are indicated above branches. Clade depth indicates mean nodal age (million years) and bars indicate 95% highest posterior density (HPD) intervals for nodal ages.

in a central position with the other three haplotypes B, C, and D radiating from haplotype A. The haplotypes of *S. belliioides* (E) and *S. gunnii* (G) were connected to the haplotype of *S. dominii* (F), which was connected to haplotype A of *S. mikadoi* separated by two mutational steps.

## DISCUSSION

### SYSTEMATIC CONSIDERATIONS

In the Bayesian tree (Fig. 3), *Solenogyne* and *Lagenophora* formed a well supported monophyletic clade, except for *L. panamensis* from Panama, that clustered with three other Astereae genera from Central America. Within *Lagenophora*, two sections, namely *Pseudomyriactis* and *Lagenophora* are recognized based on the morphological differences in the beak of the achenes and stem leaves; *L. panamensis* belongs to the former, whereas the other congeners analyzed belong to the latter (Cabrera, 1966; Cuatrecasas, 1986). The Bayesian tree is consistent with this split. Within the *Solenogyne*–*Lagenophora* clade, the first split separates four *Lagenophora* species (*L. stipitata*, *L. strangulata*, *L. cuneata*, and *L. pumila*) from other species of *Lagenophora* (*L. gracilis*, *L. lanata*, and

*L. huegelii*) plus all *Solenogyne* samples. The latter three *Lagenophora* species split off in two grades from the *Solenogyne* samples. This supports the hypothesis that *Solenogyne* has arisen from a *Lagenophora* ancestor and has a more recent origin than *Lagenophora* (Davis, 1950). The clade of *Solenogyne* plus the three *Lagenophora* species shares a monopodial habit, whereas the other *Lagenophora* species are sympodial in growth (Drury, 1974; Adams, 1979). The results from our phylogenetic analyses demonstrate that *Lagenophora* as currently defined is polyphyletic. Based on this result, one taxonomic option is synonymizing *Solenogyne* with *Lagenophora* (Bentham,

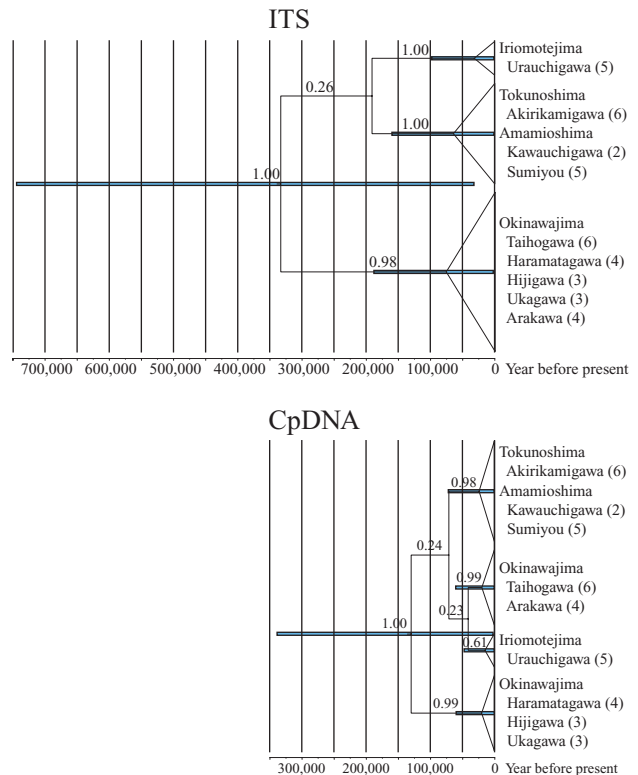

**Figure 5.** Maximum clade credibility trees based on internal transcribed spacer (ITS) and chloroplast DNA (cpDNA). Nodes with identical sequences are collapsed. Clade posterior probabilities (PP) are indicated above branches. Clade depth indicates mean nodal age (year) and nodes with  $PP \geq 0.5$  are annotated with the 95% highest posterior density (HPD) intervals for node ages by bars.

1867; Maiden & Betcher, 1916; Drury, 1974; Koyama, 1995). Transferring the three *Lagenophora* species (*L. gracilis*, *L. lanata*, and *L. huegelii*) into *Solenogyne* is another option (Adams, 1979) because they share similar habit with *Solenogyne* species. However, the type species of *Lagenophora*, *L. nudicaulis* (Comm. ex Lam.) Dusén, was not collected and examined in the present study. Thus, a taxonomic revision is beyond the scope of the present study, but it is a topic for future investigation.

#### RYUKYU–AUSTRALIA ANTITROPICAL DISTRIBUTION

*Solenogyne mikadoi* formed a clade with the three Australian congeners and this clade was sister to *L. huegelii*, which is also endemic to southern Australia (Fig. 3). In the present study, *L. pinnatifida*, which is endemic to New Zealand, was not analyzed, and therefore we cannot rule out the possibility that *L. pinnatifida* is included in the *Solenogyne*–*L. huegelii* clade or *Solenogyne* clade. The four *Solenogyne* species and *L. huegelii* share a monopodial habit (Drury, 1974) and the four *Solenogyne* species share tubular ray florets and achenes with neither beak nor gland (Davis, 1950; Cabrera, 1966; Adams, 1979), whereas *L. pinnatifida* does not have these character states. The ITS phylogeny (Fig. 3) indicated that these morphological characters have phylogenetic signals. Furthermore, morphologically, *L. pinnatifida* is regarded to form a species complex with *L. stipitata* (Drury, 1974), which formed a distinct clade with *L. strangulata*, *L. cuneata*, and *L. pumila*. Therefore, the possibility raised above appears to be low. The reconstructed phylogeny indicates a direction of dispersal from Australia to Japan. Overall, it can be safely stated that *S. mikadoi* is disjunctly distributed from its sister species more than 7000 km away, and has derived from an Australian congener. To our knowledge, this is the first molecular phylogeographical evidence for an antitropical distribution of a vascular plant between East Asia and Australia.

The age of the MRCA of *Solenogyne* was 2.38 Mya (0.93–4.16 Mya), when the lineage of *S. mikadoi* and the Australian lineage diverged (Fig. 4). This is much more recent than the collision of the Australian continent with the Philippine Sea plate arc which started by approximately 25 Mya (Hall, 2001). Thus, it was not the collision which facilitated the range expansion of *Solenogyne*. In plant species pairs showing antitropical distributions in North and South America, divergence times based on molecular data fall generally in the late Neogene to the Holocene (i.e. from 8.4 Mya to very recent) (Bell & Patterson, 2000; Fukuda, Yokoyama & Ohashi, 2001; Lia *et al.*, 2001; Wen *et al.*, 2002; Beier *et al.*, 2004; Hughes & Eastwood, 2006;

Moore, Tye & Jansen, 2006; Spalik *et al.*, 2010; Popp *et al.*, 2011). If we take other types of intercontinental disjunctions, divergence times for plant species pairs in Eastern Asia and Eastern America occurred in the late Miocene or later (0.31–16.77 Mya with average 4.98 Mya; Xiang *et al.*, 2000), and for pairs in Eurasian and western North American deserts with the Mediterranean climate, fall in the Miocene to the Holocene (0.021–21.90 Mya; Wen & Ickert-Bond, 2009). Therefore, the oldest estimates for the antitropical distributions are younger than the oldest estimates for other intercontinental disjunctions, although it is certainly premature for generalizations because not enough lineages have been analyzed with antitropical distributions. In Miocene, positions of the North and South American, African, Australian, and Eurasian continents have already been similar to the modern positions (Torsvik *et al.*, 2010). Thus, we consider that the timing of continental drift does not explain the different oldest estimates. Generally speaking, long-distance dispersals are more likely to occur within the same latitudinal climatic zone (e.g. between East Asia and North America) than between climatic zones (i.e. antitropical pairs) because dispersals are not successful unless the climates in a new land or stopovers are appropriate (Morley, 2003). Climatic oscillations during the Plio-Pleistocene (Hall, 2001) may have provided a corridor of suitable climate at some time and enabled latitudinal dispersal through the tropics. In Australia, dense closed forest cover rapidly changed to dry, open vegetation in the Pliocene (approximately 1.8–5.0 Mya) in response to climatic oscillations (Hill, 2004). In the late Pliocene, temperate rainforests in south-eastern Australia dramatically shifted to a landscape dominated by plants of Asteraceae and Poaceae and with very few sclerophyll trees (Hill, 2004; Martin, 2006). This landscape is very similar to the present-day habitats *Solenogyne* occupies in Australia. Population expansion and large production of fruits in such landscapes may have increased the chance of the range expansion from Australia to the Ryukyu Archipelago.

The age of the MRCA of three Australian *Solenogyne* species was 1.15 Mya (0.30–2.21 Mya) and, of *S. bellioides* and *S. dominii*, was 0.63 Mya (0.15–1.22 Mya) (Fig. 4). In the Pleistocene (approximately 0.01–1.80 Mya), there was very little glaciation in Australia and it was restricted to the south-eastern highlands and Tasmania (Martin, 2006). In south-eastern Australia, the alternation of more open or steppe vegetation in the drier glacial periods and more wooded vegetation in the wetter interglacial periods occurred through the Pleistocene (Martin, 2006). Fragmentation of open vegetation habitats as a result of local recovery of forests during the interglacial periods and genetic isolation may explain the

divergences of the Australian *Solenogyne* species. Their present distribution ranges are overlapping and their habitat segregation is not evident, and this may be explained by secondary contacts of the species.

Because Australia and the Ryukyu Archipelago have never been connected by land, even via the Sundaland and East Asian continent (Hall, 2001), media for an over-sea dispersal need to be considered, although the fruits of *Solenogyne* have no special mechanism for long-distance dispersal. Sea-current dispersal is unlikely because extant species of *Solenogyne* grow inland. Achenes of the four *Solenogyne* species are approximately 1–2.5 mm at the long axis (K. Nakamura, unpubl. data) and are small enough to be accidentally dispersed by migratory birds with exozoochory and/or by strong winds. Dispersal by migratory birds, which head to terrestrial habitats, appears more realistic than haphazard dispersal by strong winds. Eastern Australia and the Ryukyu Archipelago are situated on the flyway of many migratory birds called the East Asian–Australasian Flyway (Wilson & Barter, 1998; Amami Ornithologist Club, 2009). Thus, it would be possible to assume indirect or direct dispersal of achenes by these migratory birds, although it is not clear whether the East Asian–Australasian Flyway has existed for a geohistorical time scale. *Solenogyne* has an autogamous breeding system (K. Nakamura, unpubl. data), which is characteristic to antitropical distributions (Raven, 1963; Wen & Ickert-Bond, 2009) and likely facilitates long-distance migrations because new populations can be established even when a single plant colonizes and/or when suitable pollinators are absent in colonized areas (Donoghue, 2011).

It is intriguing that *Solenogyne* is absent from intervening areas such as New Guinea, Indonesia, Philippines, and Taiwan (Fig. 1). The genus may have been overlooked in these areas because some are botanically very poorly known (e.g. New Guinea). Aside from this possibility, antitropical distributions may arise from long-distance dispersal with no stop-over at the tropics or, alternatively, are the result of extinctions of intervening tropical populations of previously widespread lineages (Hilbish *et al.*, 2000; Burridge, 2002; Mabuchi *et al.*, 2004). Some migratory birds are known to fly nonstop between Australia and East Asia (Wilson & Barter, 1998). Such 'long jump' migration may explain the absence of *Solenogyne* in the intervening areas. The extinction hypothesis cannot be proven without fossil records from the tropics, as is the current case for *Solenogyne*. However, it cannot be flatly discounted either. Extinctions in the tropics can largely be attributed to two factors, namely unsuitably high temperatures during climate oscillation and/or competition with tropical species (Briggs, 1987; Hilbish *et al.*, 2000). The

climate–extinction hypothesis has been applied to antitropical distributions of many marine organisms (Parrish, Serra & Grant, 1989; Hilbish *et al.*, 2000; Mabuchi *et al.*, 2004) and also to land plants in North and South America (Raven, 1963; Wen & Ickert-Bond, 2009). This is a possible explanation for *Solenogyne*, considering that the three Australian species are distributed in temperate areas (Adams, 1979; Brown & Porteners, 1992) and *S. mikadoi*, although distributed in the subtropical Ryukyu Archipelago, grows in cool environments such as rocky beds of mountain streams (Yokota & Hiraiwa, 2006). Although in South-east Asian islands there are cooler environments at high altitudinal areas (Barlow, 1981), such niches might have been occupied by other species, as discussed below. On the other hand, the competition–extinction hypothesis appears more likely because competition with tropical species would have been severe on South-east Asian islands. These have an extremely rich flora characterized by exceptionally large numbers of relictual, archaic forms of flowering plants, suggesting persistence of tropical rain forests since the early Tertiary (Takhtajan, 1986; Morley, 2001, 2003). However, the Ryukyu Archipelago is younger and did not attain its modern form until 5–6 Mya (Chiang & Schaal, 2006), with less competition from the comparatively depauperate flora thus enabling colonization of *Solenogyne*. Many of the small islets of Wallacea have emerged from the sea by tectonic movements and been populated by plants and animals since approximately 5 Mya (Hall, 2001). During glacial periods, the huge continental shelf of Australia–New Guinea and shallow areas of the South China Sea and Java Sea were exposed as dry land, and the resulting decrease in moisture from summer and winter monsoons to the Lesser Sunda Islands, Java, Borneo, Sumatra, and the Philippines likely increased the areas of seasonal forests and grasslands in lowlands (Heaney, 1991). These newly-emerged open vegetation communities could have enabled *Solenogyne* to establish populations there, and the decrease or disappearance of the habitats in interglacial periods due to sea level rises and vegetation changes may explain the present-day absence of *Solenogyne* in South-east Asia. The long branch leading to the *S. mikadoi* clade may indicate these extinction events (Fig. 3).

Directions of intercontinental dispersals have been extensively discussed in the literature. Molecular phylogenetic studies on land plants distributed in North and South America reported more examples of southward migrations (Bell & Patterson, 2000; Fukuda *et al.*, 2001; Li *et al.*, 2002; Wen *et al.*, 2002; Beier *et al.*, 2004; Hughes & Eastwood, 2006; Moore & Jansen, 2006; Moore *et al.*, 2006; Ickert-Bond, Rydin & Renner, 2009; Spalik *et al.*, 2010; Popp *et al.*,



2011) than of northward migrations (Fukuda *et al.*, 2001; Lia *et al.*, 2001; Bell & Donoghue, 2005; Simpson, Tate & Weeks, 2005). Dominance of southward dispersal was indicated for land plants showing antitropical amphiantarctic disjunctions (Spalik *et al.*, 2010). To determine whether a predominant direction of dispersal exists in East Asia–Australia antitropical distributions, more studies are needed, while the Ryukyu Archipelago, with a much younger geohistory, might have provided suitable open habitats and acted as a sink for chance migrants from source Australian populations.

#### MIGRATORY PROCESS IN THE RYUKYU ARCHIPELAGO

In the statistical parsimony network (Fig. 2), the cpDNA haplotype A of *S. mikadoi* from Iriomotejima Island connected with the haplotype F of *S. dominii*. This indicates that an ancestral lineage of *S. mikadoi* first colonized Iriomotejima Island. The other three haplotypes of *S. mikadoi* radiated from haplotype A. This indicates that haplotype A migrated northward throughout the distribution range of the species. The northward migration was followed by local differentiations (i.e. haplotypes B and C were derived from haplotype A in Okinawajima Island, and haplotype D was derived from haplotype A in Amamioshima or Tokunoshima islands). In the statistical parsimony network of ITS, the three Australian species (ITS types D–F) were not connected to the network of *S. mikadoi* by the 95% parsimony criterion, and thus migratory direction cannot be inferred. Assuming that the ITS network is rooted at the ITS type of Iriomotejima Island, with reference to the cpDNA network, the topology of the ITS types A–C is compatible with the above migratory process deduced based on the cpDNA network.

Palaeogeographically, during the Neogene, the Ryukyu Archipelago formed a land-bridge and connected to the surrounding landmasses more than once, to Kyushu of the main Japanese islands in the north and to south-eastern China via Taiwan in the south (Ota, 1998). These land connections allowed various lineages of terrestrial organisms to expand their ranges among the islands (Ota, 1998; Nakamura *et al.*, 2009). During the Pliocene (approximately 1.8–5.0 Mya), however, subsidence created two deep-water passages in the island arc: the Tokara Gap (the Tokara tectonic strait) to the north of Amamioshima Island and the Kerama Gap to the south of Okinawajima Island (Fig. 2) (Ota, 1998). Subsequently, any land connection across these gaps was unlikely even during Quaternary glacial sea-level minima (Ota, 1998) because the sea is currently more than 1000 m deep at these two gaps (Kawana, 2002). In the early Pleistocene, present-day Amamioshima, Tokun-

oshima, and Okinawajima islands formed a large island (Fig. 2) (Ota, 1998). Subsequently, the islands were separated during the mid Pleistocene (Kimura, 2002b).

The age of the MRCA of *S. mikadoi* was estimated here as 0.33 Mya (0.03–0.75 Mya) based on ITS and 0.13 Mya (0.003–0.330 Mya) based on cpDNA (i.e. the mid Pleistocene or later). Considering the long isolation of Iriomotejima from the northern islands since the Pliocene, this result suggests that northward migration and/or gene flow occurred crossing the Kerama Gap via over-sea dispersal by wind and/or birds. Migrants from Iriomotejima Island might have colonized Okinawajima, Tokunoshima, and Amamioshima islands individually, or might have first colonized one island and then the others in a stepwise manner. The distribution patterns of the ITS types and cpDNA haplotypes showed genetic discontinuity between Okinawajima Island and Tokunoshima plus Amamioshima islands. This genetic differentiation pattern has been reported for multiple organisms (Japanese newt *Cynops*: Hayashi & Matsui, 1988; *Ceratopteris*: Watano & Masuyama, 1994; wood-feeding cockroaches *Salganea*: Maekawa *et al.*, 1999; pit vipers *Trimeresurus*: Toda *et al.*, 1999; *Lilium*: Hiramatsu *et al.*, 2001), with a rare exception that showed a genetic discontinuity between Tokunoshima and Amamioshima islands (*Aster*: Maki, 2001). This general pattern may suggest vicariance events between Okinawajima Island and Tokunoshima plus Amamioshima islands (Hiramatsu *et al.*, 2001), which is consistent with the palaeogeography in the mid to late Pleistocene (Kimura, 2002b). Alternatively, this pattern can be simply explained by a geographical distance effect; the genetic discontinuity was caused by the larger geographical distance between Okinawajima Island and the other two islands than between Tokunoshima and Amamioshima islands (Fig. 2).

#### CONCLUSIONS

A sister relationship between *S. mikadoi* and the Australian congeners was revealed and the antitropical distribution of *Solenogyne* was proven. A sister relationship between *Solenogyne* and Australia endemic *L. huegelii* indicated an Australian origin of *Solenogyne*. *Solenogyne mikadoi* and the Australian congeners diverged during the Plio-Pleistocene. The ancestral lineage of *S. mikadoi* has likely first colonized the southernmost island in the Ryukyu Archipelago, and from there northwards, most likely by over-sea dispersals. The antitropical distribution of *Solenogyne* might have arisen through long-distance dispersal across the tropics or, alternatively, through extinction in the tropics as a result of unsuitably high



temperatures during climate oscillation and/or competition from the tropical flora that survived there since the early Tertiary. The range expansion from Australia to the Ryukyu Archipelago likely followed the flourishing of *Solenogyne* in open vegetation communities radiating in south-eastern Australia during the late Pliocene. Climatic oscillations during the Plio-Pleistocene may have provided a corridor of suitable climate. Open vegetation in lowland areas, which emerged above sea in the Plio-Pleistocene in South-east Asia via tectonic movements and eustatic sea level drop could have enabled *Solenogyne* to pass through the area. This is the first molecular phylogeographical evidence for an antitropical distribution of land plants between East Asia and Australia, and contributes to a first insight into our understanding of this intriguing global phenomenon.

## ACKNOWLEDGEMENTS

We thank Kuniaki Watanabe and Ron Booth for plant materials and help in the fieldwork. This work was supported in part by a postdoctoral fellowship from Academia Sinica to K.N., a research grant from Academia Sinica to C.I.P., and Grants-in-Aid for Scientific Research from the Japan Society for the Promotion of Science to G.K. (C-20510220).

## REFERENCES

- Adams LG. 1979.** A review of the genus *Solenogyne* (Asteraceae) in Australia and New Zealand. *Brunonia* **2**: 43–65.
- Allan HH. 1982.** *Flora of New Zealand*, Vol. 1. Wellington: Government Printer.
- Amami Ornithologist Club. 2009.** *Illustrated guide to birds in Amami*. Tokyo: Bun-ichi Co.
- Australian National Botanic Gardens. 2009.** *Australian plant name index*. Available at: <http://www.anbg.gov.au/apni/index.html>
- Backer CA, van den Brink RCB Jr. 1965.** *Flora of Java*, Vol. 2. Groningen: N. V. P. Noordhoff.
- Barker NP, Weston PH, Rutschmann F, Sauquet H. 2007.** Molecular dating of the ‘Gondwanan’ plant family Proteaceae is only partially congruent with the timing of the break-up of Gondwana. *Journal of Biogeography* **34**: 2012–2027.
- Barlow BA. 1981.** The Australian flora: its origin and evolution. In: George AS, ed. *Flora of Australia*, Vol. 1. Canberra: Australian Government Publishing Service, 25–75.
- Beier BA, Nylander JAA, Chase MW, Thulin M. 2004.** Phylogenetic relationships and biogeography of the desert plant genus *Fagonia* (Zygophyllaceae), inferred by parsimony and Bayesian model averaging. *Molecular Phylogenetics and Evolution* **33**: 91–108.
- Bell CD, Donoghue MJ. 2005.** Phylogeny and biogeography of Valerianaceae (Dipsacales) with special reference to the South American valerians. *Organisms. Diversity & Evolution* **5**: 147–159.
- Bell CD, Patterson RW. 2000.** Molecular phylogeny and biogeography of *Linanthus* (Polemoniaceae). *American Journal of Botany* **87**: 1857–1870.
- Bentham G. 1867.** *Flora Australiensis*, Vol. 3. London: L. Reeve.
- Briggs JC. 1987.** Antitropical distribution and evolution in the Indo-West Pacific Ocean. *Systematic Zoology* **36**: 237–247.
- Briggs JC. 1995.** *Global biogeography*. New York, NY: Elsevier.
- Brown EA, Porteners MF. 1992.** *Solenogyne*. In: Harden GJ, ed. *Flora of New South Wales*, Vol. 3. New South Wales: New South Wales University Press, 154–155.
- Burridge CP. 2002.** Antitropicality of Pacific fishes: molecular insights. *Environmental Biology of Fishes* **65**: 151–164.
- Cabrera AL. 1966.** The genus *Lagenophora* (Compositae). *Blumea* **14**: 285–308.
- Cheeseman TF. 1925.** *Manual of the New Zealand flora*, 2nd edn. Wellington: Government Printer.
- Chen YL, Jin SY. 2005.** *Lagenophora* Cass. In: Fu LK, Chen TQ, Lang KY, Hong T, Lin Q, Li R, eds. *Higher plants of China*. Qingdao: Qingdao Publishing House, 158–159.
- Chiang TY, Schaal BA. 2006.** Phylogeography of plants in Taiwan and the Ryukyu Archipelago. *Taxon* **55**: 31–41.
- Clement M, Posada D, Crandall KA. 2000.** TCS: a computer program to estimate gene genealogies. *Molecular Ecology* **9**: 1657–1660.
- Constance L. 1963.** Amphitropical relationships in the herbaceous flora of the pacific coast of North and South America: a symposium. *Quarterly Review of Biology* **38**: 109–116.
- Cuatrecasas J. 1986.** Un género nuevo de Astereae, Compositae, de Colombia. *Anales Jardín Botánico de Madrid* **42**: 415–426.
- Davis GL. 1950.** Revision of the genus *Solenogyne* Cass. *Proceedings of the Linnean Society of New South Wales* **75**: 188–194.
- Donoghue MJ. 2011.** Bipolar biogeography. *Proceedings of the National Academy of Sciences of the United States of America* **108**: 6341–6342.
- Doyle JJ, Doyle JL. 1987.** A rapid DNA isolation procedure for small quantities of fresh leaf tissue. *Phytochemistry Bulletin* **19**: 11–15.
- Drummond AJ, Ho SYW, Phillips MJ, Rambaut A. 2006.** Relaxed phylogenetics and dating with confidence. *PLoS Biology* **4**: 699–710.
- Drummond AJ, Ho SYW, Rawlence N, Rambaut A. 2007.** *A rough guide to BEAST 1.4*. Available at: <http://beast.bio.ed.ac.uk>
- Drummond AJ, Rambaut A. 2007.** BEAST: Bayesian evolutionary analysis by sampling trees. *BMC Evolutionary Biology* **7**: 214.
- Drury DG. 1974.** A broadly based taxonomy of *Lagenifera* section *Lagenifera* and *Solenogyne* (Compositae-Astereae), with an account of their species in New Zealand. *New Zealand Journal of Botany* **12**: 365–395.

- Ekman S. 1953.** *Zoogeography of the sea*. London: Sidwick and Jackson.
- Farris JS, Källersjö M, Kluge AG, Bult C. 1994.** Testing significance of incongruence. *Cladistics: The International Journal of the Willi Hennig Society* **10**: 315–319.
- Felsenstein J. 1985.** Confidence limits on phylogenies: an approach using the bootstrap. *Evolution* **39**: 783–791.
- Felsenstein J. 1988.** Phylogenies from molecular sequences: inference and reliability. *Annual Review of Genetics* **22**: 521–565.
- Fukuda T, Yokoyama J, Ohashi H. 2001.** Phylogeny and biogeography of the genus *Lycium* (Solanaceae): inferences from chloroplast DNA sequences. *Molecular Phylogenetics and Evolution* **19**: 246–258.
- Givnish TJ, Renner SS. 2004.** Tropical intercontinental disjunctions: Gondwana breakup, immigration from the boreotropics, and transoceanic dispersal. *International Journal of Plant Sciences* **165**: S1–S6.
- Gray A. 1878.** Forest geography and archaeology: a lecture delivered before the Harvard University Natural History Society. *American Journal of Science and Arts, Series 3* **16**: 85–94 183–196.
- Hall R. 2001.** Cenozoic reconstructions of SE Asia and the SW Pacific: changing patterns of land and sea. In: Metcalfe I, Smith JMB, Morwood M, Davidson I, eds. *Faunal and floral migrations and evolution in SE Asia–Australia*. Lisse: A. A. Balkema Publishers, 35–56.
- Hatusima S. 1975.** *Flora of the Ryukyus*. Added and corrected. Naha: Okinawa Association of Biology Education.
- Hatusima S. 1980.** Origin of the flora. In: Kizaki K, ed. *Natural history of the Ryukyus*. Tokyo: Tsukijishokan, 113–123.
- Hatusima S. 1985.** Note on *Oxalis amamiana* Hatusima. *Reports on Plants in Japan* **24**: 23.
- Hayashi T, Matsui M. 1988.** Biochemical differentiation in Japanese Newts, Genus *Cynops* (Salamandridae). *Zoological Science* **5**: 1121–1136.
- Heaney LR. 1991.** A synopsis of climatic and vegetational change in Southeast Asia. *Climatic Change* **19**: 53–61.
- Heled J, Drummond AJ. 2010.** Bayesian inference of species trees from multilocus data. *Molecular Biology and Evolution* **27**: 570–580.
- Hilbish TJ, Mullinax A, Dolven SI, Meyer A, Koehn RK, Rawson PD. 2000.** Origin of the antitropical distribution pattern in marine mussels (*Mytilus* spp.): routes and timing of transequatorial migration. *Marine Biology* **136**: 69–77.
- Hill RS. 2004.** Origin of the southeastern Australian vegetation. *Transactions of the Royal Society of London Series B, Biological Sciences* **359**: 1537–1549.
- Hiramatsu M, Ii K, Okubo H, Huang KL, Huang CW. 2001.** Biogeography and origin of *Lilium longiflorum* and *L. formosanum* (Liliaceae) endemic to the Ryukyu Archipelago and Taiwan as determined by allozyme diversity. *American Journal of Botany* **88**: 1230–1239.
- Hooker JD. 1881.** *Flora of British India*, Vol. 3. Ashford: Reeve.
- Hubbs CL. 1952.** Antitropical distribution of fishes and other organisms. *Proceeding of the Seventh Pacific Science Congress* **3**: 324–329.
- Hughes C, Eastwood R. 2006.** Island radiation on a continental scale: exceptional rates of plant diversification after uplift of the Andes. *Proceedings of the National Academy of Sciences of the United States of America* **103**: 10334–10339.
- Ickert-Bond SM, Rydin C, Renner SS. 2009.** A fossil-calibrated relaxed clock for *Ephedra* indicates an Oligocene age for the divergence of Asian and New World clades and Miocene dispersal into South America. *Journal of Systematics and Evolution* **47**: 444–456.
- Johnson LA, Soltis DE. 1994.** *atpB-rbcL* sequences and phylogenetic reconstruction in *Saxifragaceae* s. str. *Systematic Botany* **19**: 143–156.
- Kass RE, Raftery AE. 1995.** Bayes factors. *Journal of the American Statistical Association* **90**: 773–795.
- Kawana T. 2002.** Neotectonics of the Ryukyu Arc. In: Kimura M, ed. *The formation of the Ryukyu Arc and migration of biota to the arc*. Naha: Okinawa Times, 59–83.
- Kay K, Whittall J, Hodges S. 2006.** A survey of nuclear ribosomal internal transcribed spacer substitution rates across angiosperms: an approximate molecular clock with life history effects. *Evolutionary Biology* **6**: 36–44.
- Kim YD, Jansen RK. 1998.** Chloroplast DNA restriction site variation and phylogeny of the Berberidaceae. *American Journal of Botany* **85**: 1766–1778.
- Kimura M. 2002a.** *The formation of the Ryukyu arc and migration of biota to the arc*. Naha: Okinawa Times.
- Kimura M. 2002b.** Formation and paleogeography of the Ryukyu Arc. In: Kimura M, ed. *The formation of the Ryukyu arc and migration of biota to the arc*. Naha: Okinawa Times, 19–54.
- Koyama H. 1995.** *Lagenophora* Cass. In: Iwatsuki K, Yamazaki T, Boufford DE, Ohba H, eds. *Flora of Japan*, Vol. 3b. Tokyo: Kodansha, 58.
- Li J, Alexander III J, Ward T, Del Tredici P, Nicholson R. 2002.** Phylogenetic relationships of Empetraceae inferred from sequences of chloroplast gene *matK* and nuclear ribosomal DNA ITS region. *Molecular Phylogenetics and Evolution* **25**: 306–315.
- Lia VV, Confalonieri VA, Comas CI, Hunziker JH. 2001.** Molecular phylogeny of *Larrea* and its allies (Zygophyllaceae): reticulate evolution and the probable time of creosote bush arrival to North America. *Molecular Phylogenetics and Evolution* **21**: 309–320.
- Mabberley DJ. 1997.** *The plant-book. A portable dictionary of the vascular plants*, 2nd edn. Cambridge: Cambridge University press.
- Mabuchi K, Nakabo T, Nishida M. 2004.** Molecular phylogeny of the antitropical genus *Pseudolabrus* (Perciformes: Labridae): evidence for southern hemisphere origin. *Molecular Phylogenetics and Evolution* **32**: 375–382.
- Maekawa F. 1974.** Origin and characteristics of Japan's flora. In: Numata M, ed. *The flora and vegetation of Japan*. Tokyo: Kodansha Scientific, 33–86.
- Maekawa K, Lo N, Kitade O, Miura T, Matsumoto T. 1999.** Molecular phylogeny and geographic distribution of

- wood-feeding cockroaches in East Asian Islands. *Molecular Phylogenetics and Evolution* **13**: 360–376.
- Maiden JH, Betcher E. 1916.** *A census of New South Wales plants*. Sydney: Government Printer.
- Maki M. 2001.** Genetic differentiation within and among island populations of the endangered plant *Aster miyagii* (Asteraceae), an endemic to the Ryukyu Islands. *American Journal of Botany* **88**: 2189–2194.
- Martin HA. 2006.** Cenozoic climatic change and the development of the arid vegetation in Australia. *Journal of Arid Environments* **66**: 533–563.
- Mill W. 1999.** *Lagenifera* Cass. In: Wagner WL, Herbst DR, Sohmer SH, eds. *Manual of the flowering plants of Hawai'i*, rev. edn, Vol. 1. Honolulu: Bishop Museum Press, 329–331.
- Moore MJ, Jansen RJ. 2006.** Molecular evidence for the age, origin, and evolutionary history of the American desert plant genus *Tiquilia* (Boraginaceae). *Molecular Phylogenetics and Evolution* **39**: 668–687.
- Moore MJ, Tye A, Jansen RK. 2006.** Patterns of long-distance dispersal in *Tiquilia* subg. *Tiquilia* (Boraginaceae): implications for the origins of amphitropical disjuncts and Galapagos Island endemics. *American Journal of Botany* **93**: 1163–1177.
- Morley RJ. 2001.** Why are there so many primitive angiosperms in the rain forests of Asia-Australasia? In: Metcalfe I, Smith JMB, Morwood M, Davidson I, eds. *Faunal and floral migrations and evolution in SE Asia-Australia*. Lisse: A.A. Balkema Publishers, 185–199.
- Morley RJ. 2003.** Interplate dispersal paths for megathermal angiosperms. *Perspectives in Plant Ecology, Evolution and Systematics* **6**: 5–20.
- Murata J. 1992.** Morphology and chromosome number of *Lobelia loochooensis* Koidz. *Journal of Japanese Botany* **67**: 282–285.
- Muse SV, Weir BS. 1992.** Testing for equality of evolutionary rates. *Genetics* **132**: 269–276.
- Nakamura K, Chung SW, Kokubugata G, Denda T, Yokota M. 2006.** Phylogenetic systematics of the monotypic genus *Hayataella* (Rubiaceae) endemic to Taiwan. *Journal of Plant Research* **119**: 657–661.
- Nakamura K, Denda T, Kameshima O, Yokota M. 2007.** Breakdown of distyly in a tetraploid variety of *Ophiorrhiza japonica* (Rubiaceae) and its phylogenetic analysis. *Journal of Plant Research* **120**: 501–509.
- Nakamura K, Denda T, Kokubugata G, Suwa R, Yang TYA, Peng CI, Yokota M. 2010.** Phylogeography of *Ophiorrhiza japonica* (Rubiaceae) in continental islands, the Ryukyu Archipelago, Japan. *Journal of Biogeography* **37**: 1907–1918.
- Nakamura K, Suwa R, Denda T, Yokota M. 2009.** Geohistorical and current environmental influences on floristic differentiation in the Ryukyu Archipelago, Japan. *Journal of Biogeography* **36**: 919–928.
- Namoff S, Luke Q, Jiménez F, Veloz A, Lewis CE, Sosa V, Maunder M, Francisco-Ortega J. 2010.** Phylogenetic analyses of nucleotide sequences confirm a unique plant intercontinental disjunction between tropical Africa, the Caribbean, and the Hawaiian Islands. *Journal of Plant Research* **123**: 57–65.
- Nesom GL, Robinson H. 2007.** XV. Tribe Astereae. In: Kadereit JW, Jeffrey C, eds. *The families and genera of vascular plants*, Vol. 8. Heidelberg: Springer, 315–376.
- Noyes RD, Rieseberg LH. 1999.** ITS sequence data support a single origin for North American Astereae (Asteraceae) and reflect deep geographic divisions in *Aster* s.l. *American Journal of Botany* **86**: 398–412.
- Ota H. 1998.** Geographic patterns of endemism and speciation in amphibians and reptiles of the Ryukyu Archipelago, Japan, with special reference to their paleogeographical implications. *Researches on Population Ecology* **40**: 189–204.
- Otsuka H, Ota H, Hotta M. 2000.** *Tropics*, Vol. 10. Special issue: the Ryukyu Islands – the area of adaptive radiation and extinction of island fauna. Kagoshima: The Japan Society of Tropical Ecology.
- Page RDM. 1996.** TREEVIEW: an application to display phylogenetic trees on personal computers. *Computer Applications in the Bioscience* **12**: 357–358.
- Parris BS. 2001.** Circum-Antarctic continental distribution patterns in pteridophyte species. *Brittonia* **53**: 270–283.
- Parrish RH, Serra R, Grant WS. 1989.** The monotypic sardines, *Sardina* and *Sardinops*: their taxonomy, distribution, stock structure, and zoogeography. *Canadian Journal of Fisheries and Aquatic Science* **46**: 2019–2036.
- Pielou EC. 1979.** *Biogeography*. New York, NY: John Wiley and Sons.
- Popp M, Mirré V, Brochmann C. 2011.** A single Mid-Pleistocene long-distance dispersal by a bird can explain the extreme bipolar disjunction in crowberries (*Empetrum*). *Proceedings of the National Academy of Sciences of the United States of America* **108**: 6520–6525.
- Porteners MF, Brown EA. 1992.** *Lagenifera*. In: Harden GJ, ed. *Flora of New South Wales*, 3. New South Wales: New South Wales University Press, 153–154.
- Posada D, Crandall KA. 1998.** Modeltest: testing the model of DNA substitution. *Bioinformatics* **14**: 817–818.
- Qiu YL, Chase MW, Parks CR. 1995.** A chloroplast DNA phylogenetic study of the eastern Asia-eastern North America disjunct section *Rytidospermum* of *Magnolia* (Magnoliaceae). *American Journal of Botany* **82**: 1582–1588.
- Quek SP, Davies SJ, Itino T, Pierce NE. 2004.** Codiversification in an ant-plant mutualism: stem texture and the evolution of host use in *Crematogaster* (Formicidae: Myrmicinae) inhabitants of *Macaranga* (Euphorbiaceae). *Evolution* **58**: 554–570.
- Randall JE. 1981.** Examples of antitropical and antiequatorial distribution of Indo-West-Pacific fishes. *Pacific Science* **35**: 197–209.
- Raven PH. 1963.** Amphitropical relationships in the floras of North and South America. *Quarterly Review of Biology* **38**: 151–177.
- Raven PH, Axelrod DI. 1974.** Angiosperm biogeography and past continental movements. *Annals of the Missouri Botanical Garden* **61**: 539–673.
- Richardson JE, Pennington RT, Pennington TD,**



- Hollingsworth PM. 2001.** Rapid diversification of a species-rich genus of neotropical rain forest trees. *Science* **293**: 2242–2245.
- Ronquist F, Huelsenbeck JP. 2003.** MrBayes 3: Bayesian phylogenetic inference under mixed models. *Bioinformatics* **19**: 1572–1574.
- Rowe DL, Dunn KA, Adkins RM, Honeycutt RL. 2010.** Molecular clocks keep dispersal hypotheses afloat: evidence for trans-Atlantic rafting by rodents. *Journal of Biogeography* **37**: 305–324.
- Santelices B. 1980.** Phytogeographic characterization of the temperate coast of Pacific South America. *Phycologia* **19**: 1–12.
- Shinjo K, Ikehara N. 2006.** *Eriachne armitii* F. Muell. In: Nature Conservation Division, Department of Cultural, Environmental Affairs, Okinawa Prefectural Government, ed. *Threatened wildlife in Okinawa, 2nd ed (fungi and plants), Red Data Okinawa*. Naha: Nature Conservation Division, Department of Cultural, Environmental Affairs, Okinawa Prefectural Government, 202–203.
- Simmons MP, Ochoterena H. 2000.** Gaps as characters in sequence-based phylogenetic analyses. *Systematic Biology* **49**: 369–381.
- Simpson BB, Tate JA, Weeks A. 2005.** The biogeography of *Hoffmannseggia* (Leguminosae, Caesalpinoideae, Caesalpiniaceae): a tale of many travels. *Journal of Biogeography* **32**: 15–27.
- Soejima A, Peng CI. 1998.** *Lagenophora* Cass. In: Editorial committee of the Flora of Taiwan, ed. *Flora of Taiwan*, 2nd edn, Vol. 4. Taipei: Editorial committee of the Flora of Taiwan, 1004–1006.
- Soltis DE, Kuzoff R. 1995.** Discordance between nuclear and chloroplast phylogenies in the *Heuchera* group (Saxifragaceae). *Evolution* **49**: 727–742.
- Soltis DE, Soltis PS, Collier TG, Edgerton ML. 1991.** Chloroplast DNA variation within and among genera of the *Heuchera* group (Saxifragaceae): evidence for chloroplast transfer and paraphyly. *American Journal of Botany* **78**: 1091–1112.
- Soltis DE, Xiang QY, Hufford L. 1995.** Relationships and evolution of Hydrangeaceae based on *rbcL* sequence data. *American Journal of Botany* **82**: 504–514.
- Spalik K, Piwczyński M, Danderson CA, Kurzydowski R, Bone TS, Downie SR. 2010.** Amphitropic amphiantarctic disjunctions in Apiaceae subfamily Apiaceae. *Journal of Biogeography* **37**: 1977–1994.
- Suchard MA, Weiss RE, Sinsheimer JS. 2001.** Bayesian selection of continuous-time Markov chain evolutionary models. *Molecular Biology and Evolution* **18**: 1001–1013.
- Swofford DL. 2002.** PAUP\*. *Phylogenetic analysis using parsimony (\*and other methods)*, Version 4.0b10. Sunderland, MA: Sinauer Associates.
- Takezaki N, Rzhetsky A, Nei M. 1995.** Phylogenetic test of the molecular clock and linearized trees. *Molecular Biology and Evolution* **12**: 823–833.
- Takhtajan A. 1986.** *Floristic regions of the world*. Berkeley, CA: University of California Press.
- Thompson JD, Gibson TJ, Plewniak F, Jeanmougin F, Higgins DG. 1997.** The ClustalX windows interface: flexible strategies for multiple sequence alignment aided by quality analysis tools. *Nucleic Acids Research* **24**: 4876–4882.
- Thorne RF. 1972.** Major disjunctions in the geographic ranges of seed plants. *Quarterly Review of Biology* **47**: 365–411.
- Toda M, Nishida M, Tu MC, Hikida T, Ota H. 1999.** Genetic variation, phylogeny and biogeography of the pit vipers of the genus *Trimeresurus* sensu lato (Reptilia: Viperidae) in the subtropical East Asian islands. In: Ota H, ed. *Tropical island herpetofauna: origin, current diversity, and conservation*. Amsterdam: Elsevier Science, 249–270.
- Torsvik TH, Steinberger B, Gurnis M, Gaina C. 2010.** Plate tectonics and net lithosphere rotation over the past 150 My. *Earth and Planetary Science Letters* **291**: 106–112.
- Vijverberg K, Mes THM, Bachmann K. 1999.** Chloroplast DNA evidence for the evolution of *Microseris* (Asteraceae) in Australia and New Zealand after long-distance dispersal from western North America. *American Journal of Botany* **86**: 1448–1463.
- Wagstaff SJ, Breitwieser I. 2002.** Phylogenetic relationships of New Zealand Asteraceae inferred from ITS sequences. *Plant Systematics and Evolution* **231**: 203–224.
- Watano Y, Masuyama S. 1994.** Genetic differentiation in populations of the polymorphic fern *Ceratopteris thalictroides* in Japan. *Journal of Plant Research* **107**: 139–146.
- Wen J. 1999.** Evolution of eastern Asian and eastern North American disjunctions in flowering plants. *Annual Review of Ecology and Systematics* **30**: 421–455.
- Wen J, Ickert-Bond SM. 2009.** Evolution of the Madrean–Thethyan disjunctions and the North and South American amphitropical disjunctions in plants. *Journal of Systematics and Evolution* **47**: 331–348.
- Wen J, Lowry PP II, Walck JL, Yoo KO. 2002.** Phylogenetic and biogeographic diversification in *Osmorhiza* (Apiaceae). *Annals of the Missouri Botanical Garden* **89**: 414–428.
- White TJ, Bruns T, Lee A, Taylor J. 1990.** Amplification and direct sequencing of fungal ribosomal RNA genes for phylogenetics. In: Innis M, Gelfand D, Sninsky J, White T, eds. *PCR protocols: a guide to methods and application*. San Diego, CA: Academic Press, 315–322.
- Wilson JR, Barter MA. 1998.** Identification of potentially important staging areas for ‘long jump’ migrant waders in the East Asian–Australian Flyway during northward migration. *The Stilt* **32**: 14–26.
- Wu ZY. 1983.** On the significance of Pacific intercontinental discontinuity. *Annals of the Missouri Botanical Garden* **70**: 577–590.
- Xiang QY, Soltis DE, Soltis PS, Steven R, Crawford DJ. 2000.** Timing the Eastern Asian–Eastern North American floristic disjunction: molecular clock corroborates paleontological estimates. *Molecular Phylogenetics and Evolution* **15**: 462–472.
- Yokota M, Hiraiwa A. 2006.** *Solenogyne mikadoi* Koidz. In: Nature Conservation Division, Department of Cultural,



- Environmental Affairs, Okinawa Prefectural Government, ed. *Threatened wildlife in Okinawa, 2nd ed (fungi and plants), Red Data Okinawa*. Naha: Nature Conservation Division, Department of Cultural, Environmental Affairs, Okinawa Prefectural Government, 179.
- Yokota M, Shinzato T. 2006a.** *Cassytha filiformis* L. var. *duipraticola* Hatusima. In: Nature Conservation Division, Department of Cultural, Environmental Affairs, Okinawa Prefectural Government, ed. *Threatened wildlife in Okinawa, 2nd ed (fungi and Plants), Red Data Okinawa*. Naha: Nature Conservation Division, Department of Cultural, Environmental Affairs, Okinawa Prefectural Government, 74–75.
- Yokota M, Shinzato T. 2006b.** *Cassytha glabella* R.Br. In: Nature Conservation Division, Department of Cultural, Environmental Affairs, Okinawa Prefectural Government, ed. *Threatened wildlife in Okinawa, 2nd ed (fungi and plants), Red Data Okinawa*. Naha: Nature Conservation Division, Department of Cultural, Environmental Affairs, Okinawa Prefectural Government, 75.
